# Supplementary material for: Synthesis of tetrahydro-β-carbolines from 2-indolylmethyl azides and propargylic alcohols
Source: Royal Society of Chemistry journal article supplement (doi:10.1039/d1ra03022a), 2021-01-01

# **Electronic Supplementary Information**

*For*

## **Synthesis of tetrahydro- $\beta$ -carbolines from 2-indolylmethyl azides and propargylic alcohols**

Haiting Yin,<sup>a</sup> Qin Ma,<sup>a</sup> Yushan Wang,<sup>a</sup> Xiaoxia Gu,<sup>a</sup> Zhijun Feng,<sup>a</sup> Yunjun Wu,<sup>a</sup> Ming Wang,<sup>a</sup> and Shaoyin Wang <sup>\*a</sup>

<sup>a</sup>Department of Chemistry, Institute of Synthesis and Application of Medical Materials, Chunhui Scientific Research Interest Group, Wannan Medical College, Wuhu, Anhui 241002, China.

E-mail: wsychem@163.com

### **Table of Contents**

|                                                                 |               |
|-----------------------------------------------------------------|---------------|
| <b>Copies of <sup>1</sup>H NMR and <sup>13</sup>C NMR .....</b> | <b>S2-S39</b> |
|-----------------------------------------------------------------|---------------|

# Copies of $^1\text{H}$ NMR and $^{13}\text{C}$ NMR

DMSO- $d_6$ , 300MHz

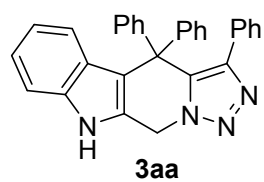

DMSO- $d_6$ , 75MHz

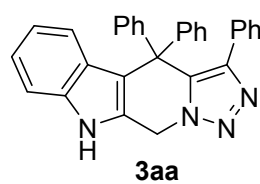

DMSO-*d*<sub>6</sub>, 300MHz

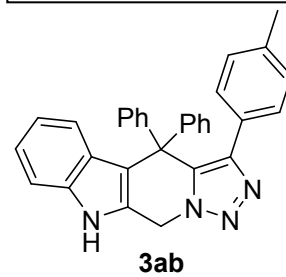

DMSO-*d*<sub>6</sub>, 75MHz

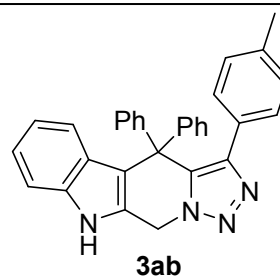

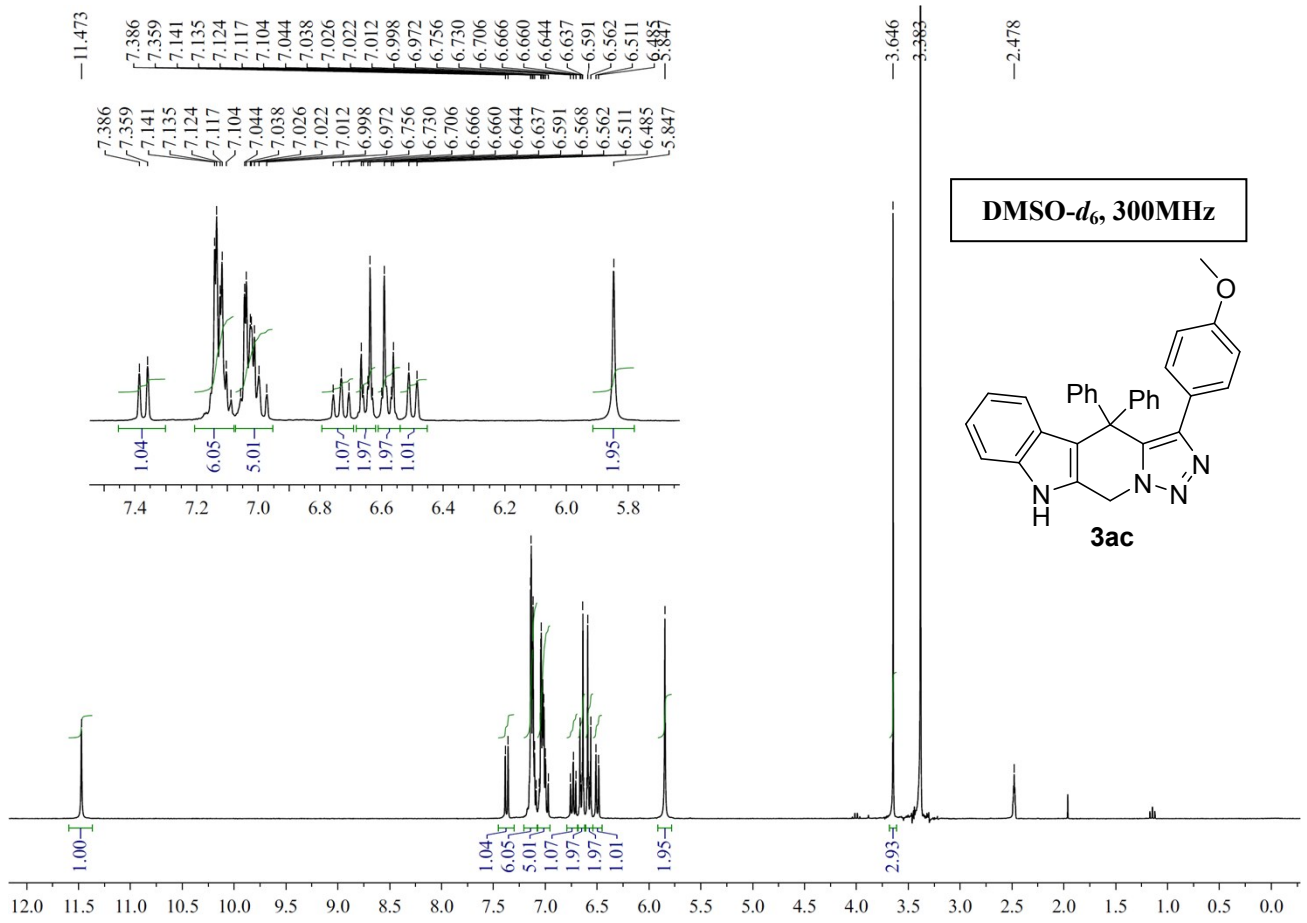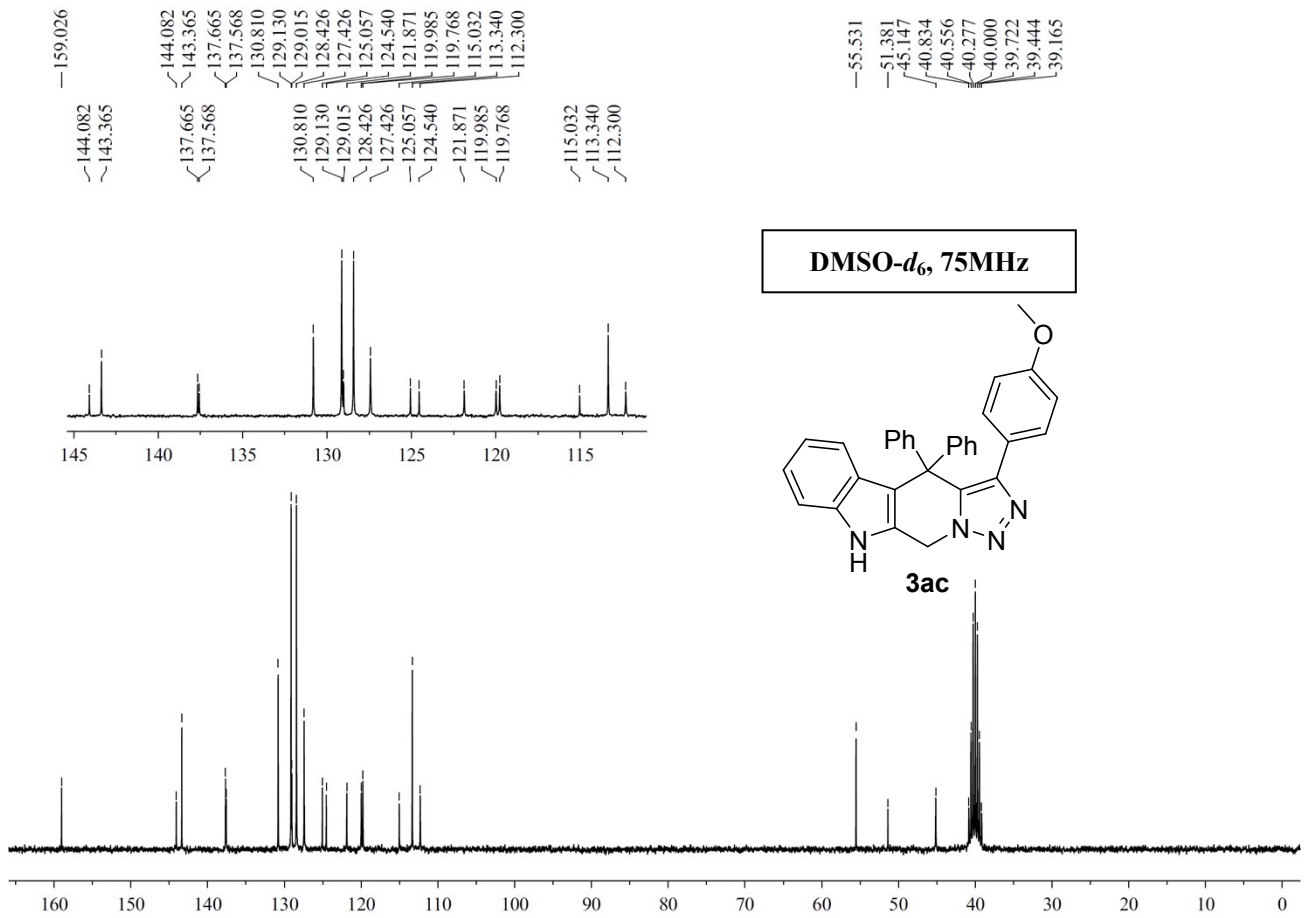

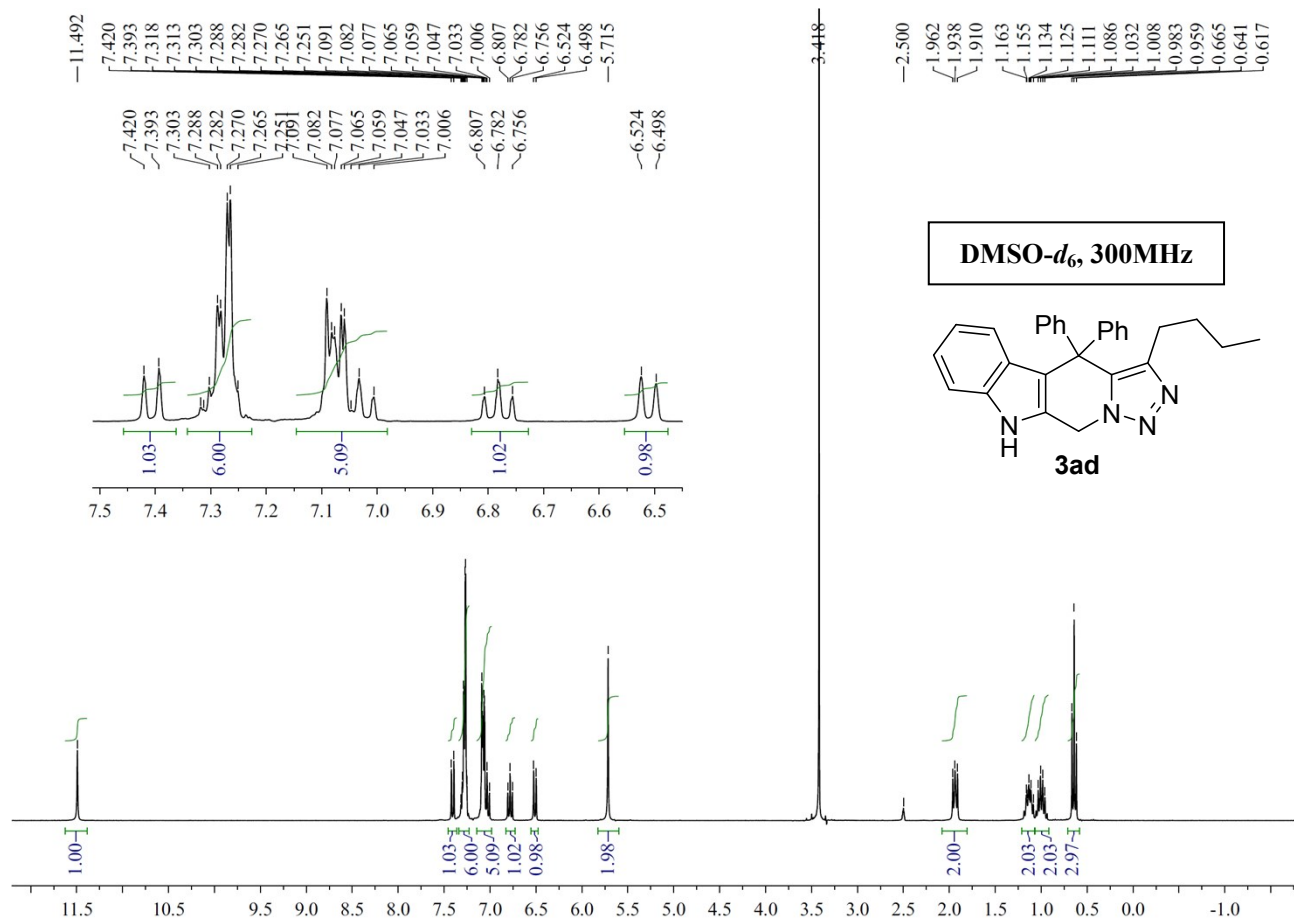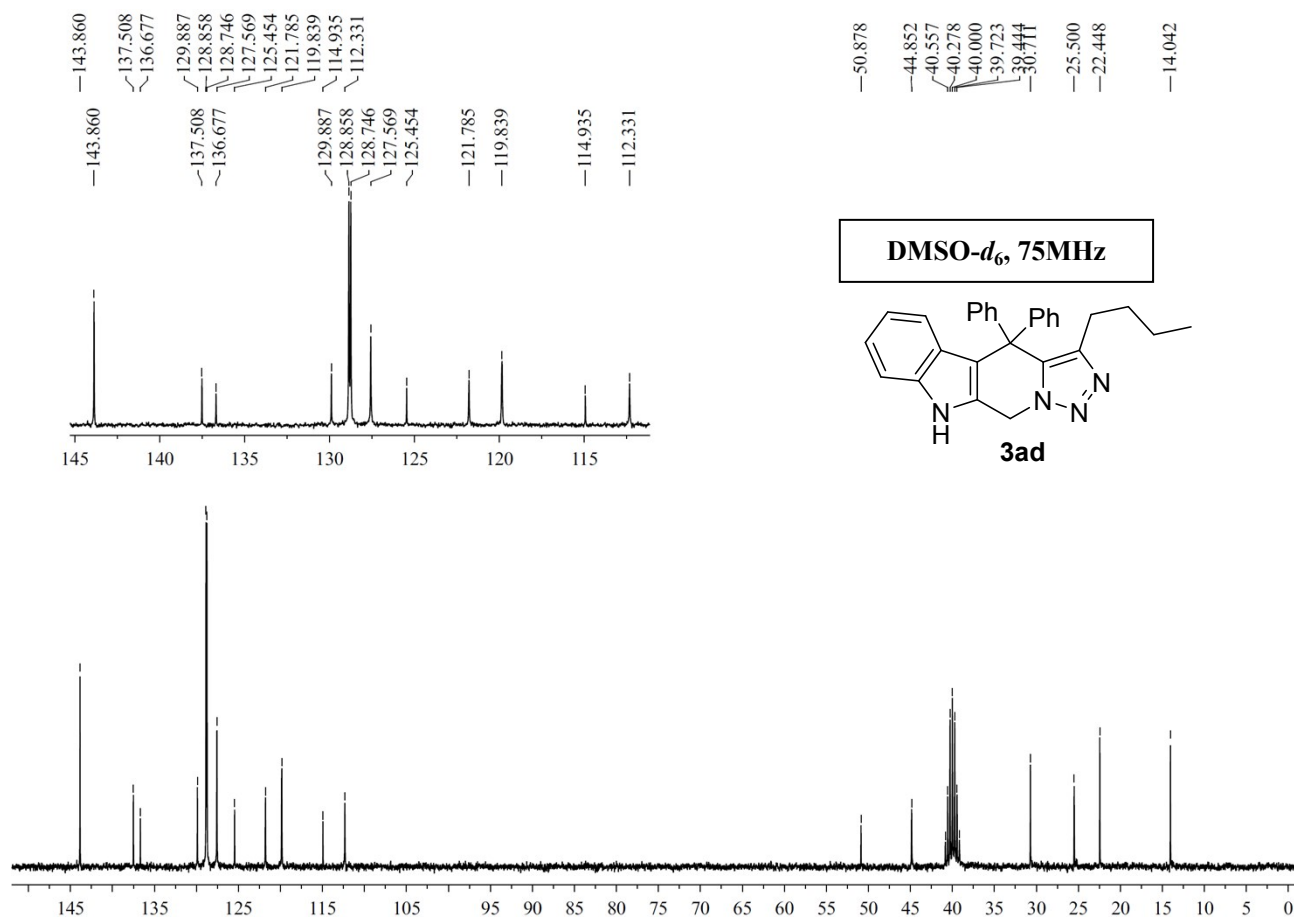

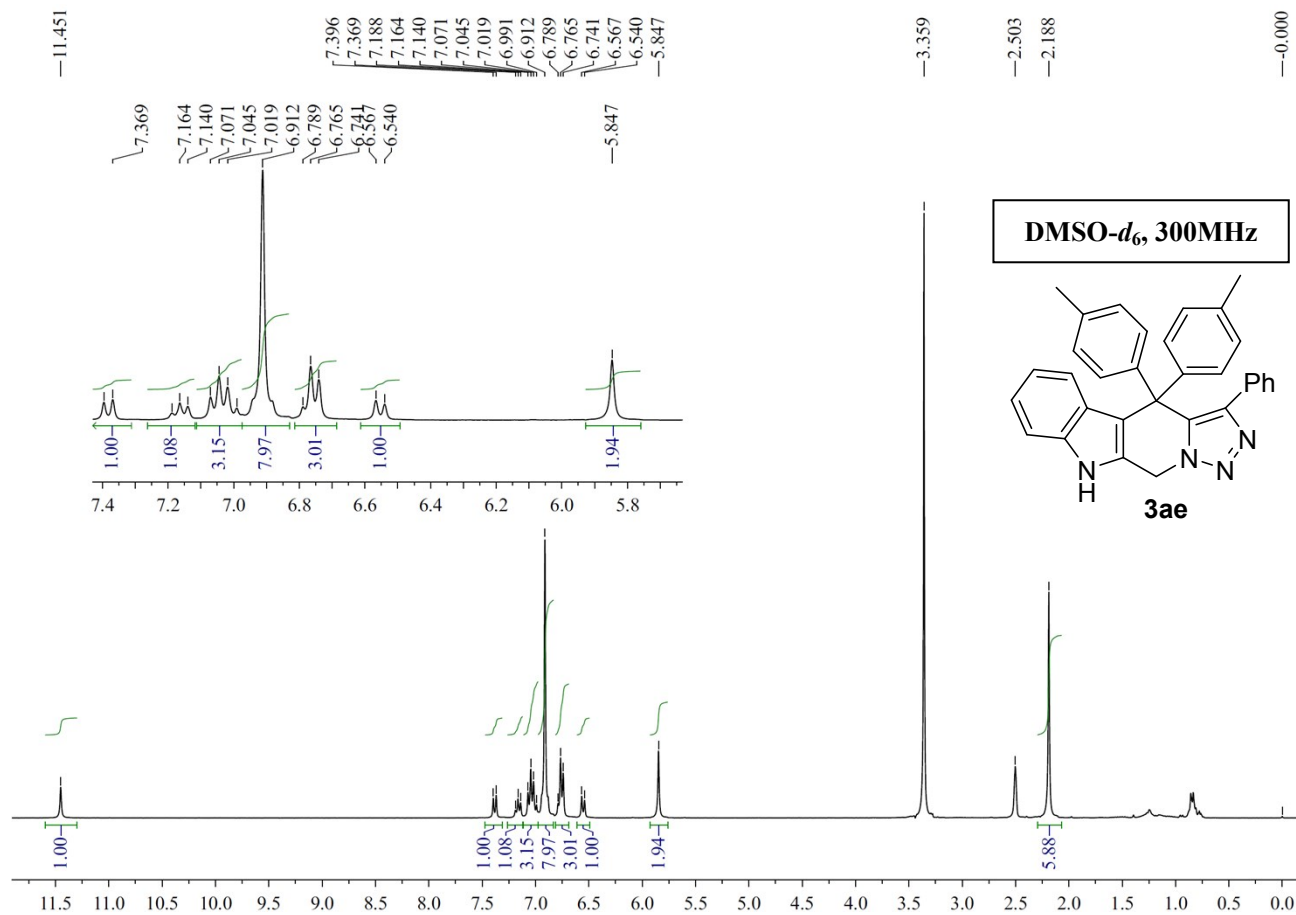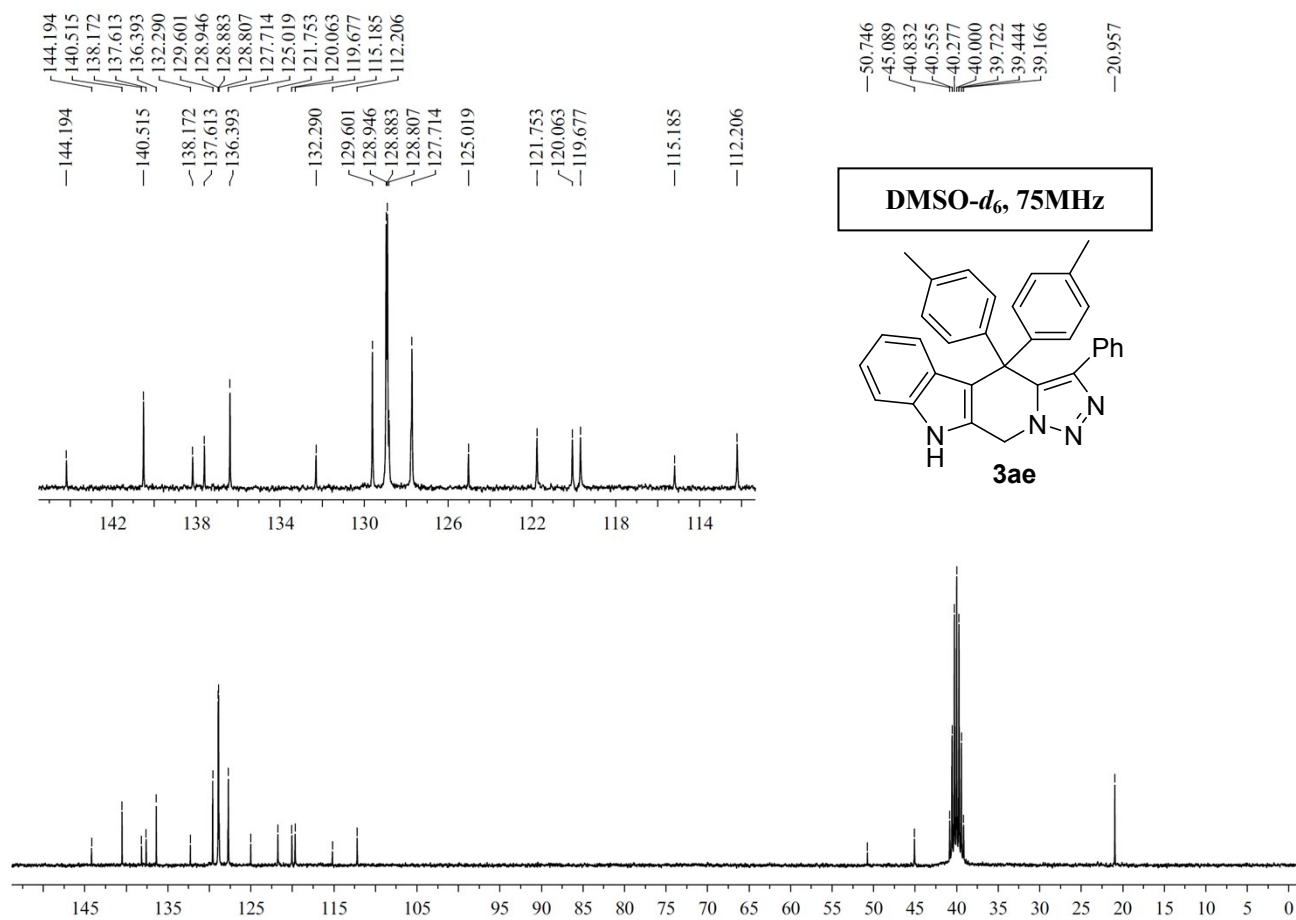

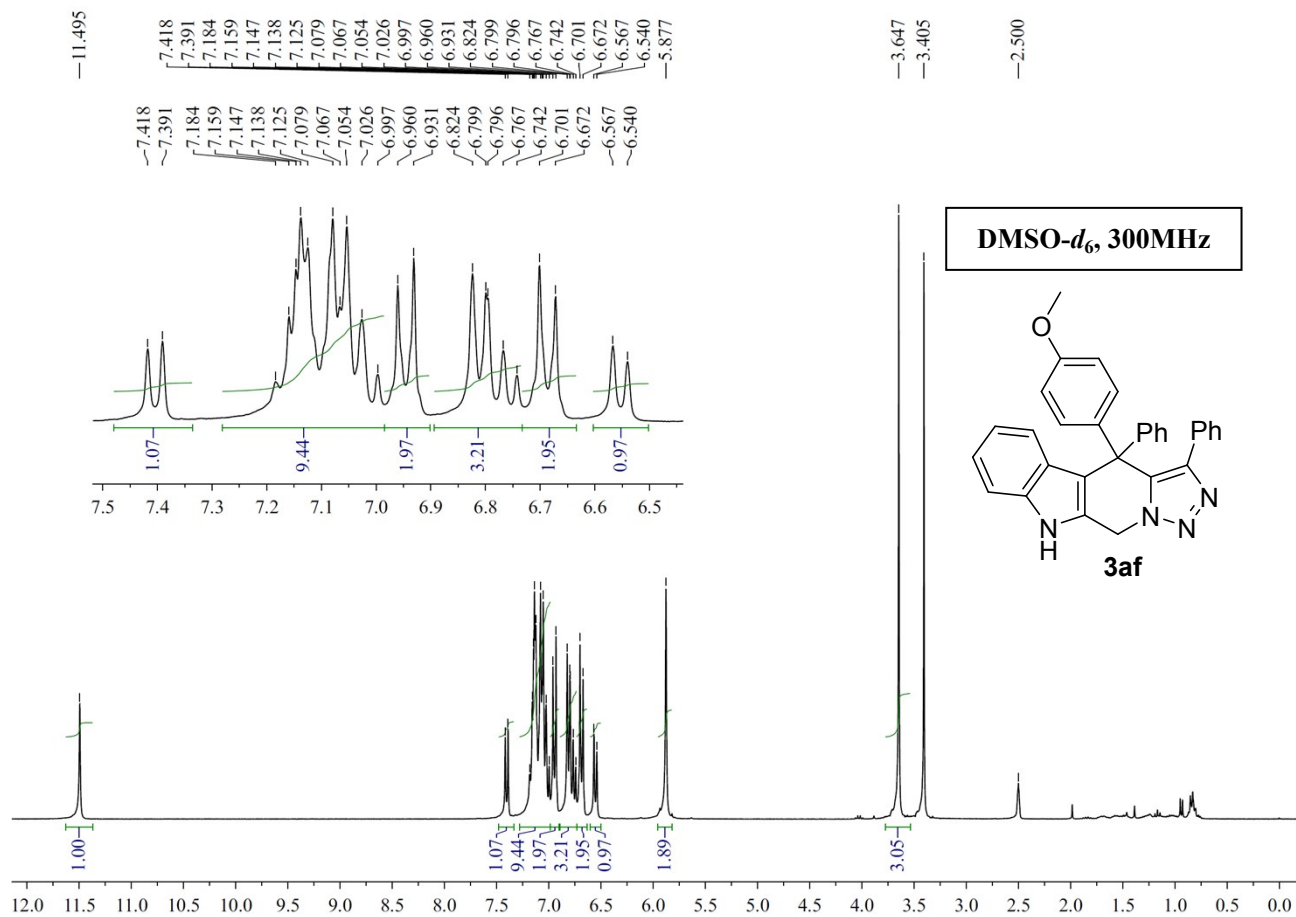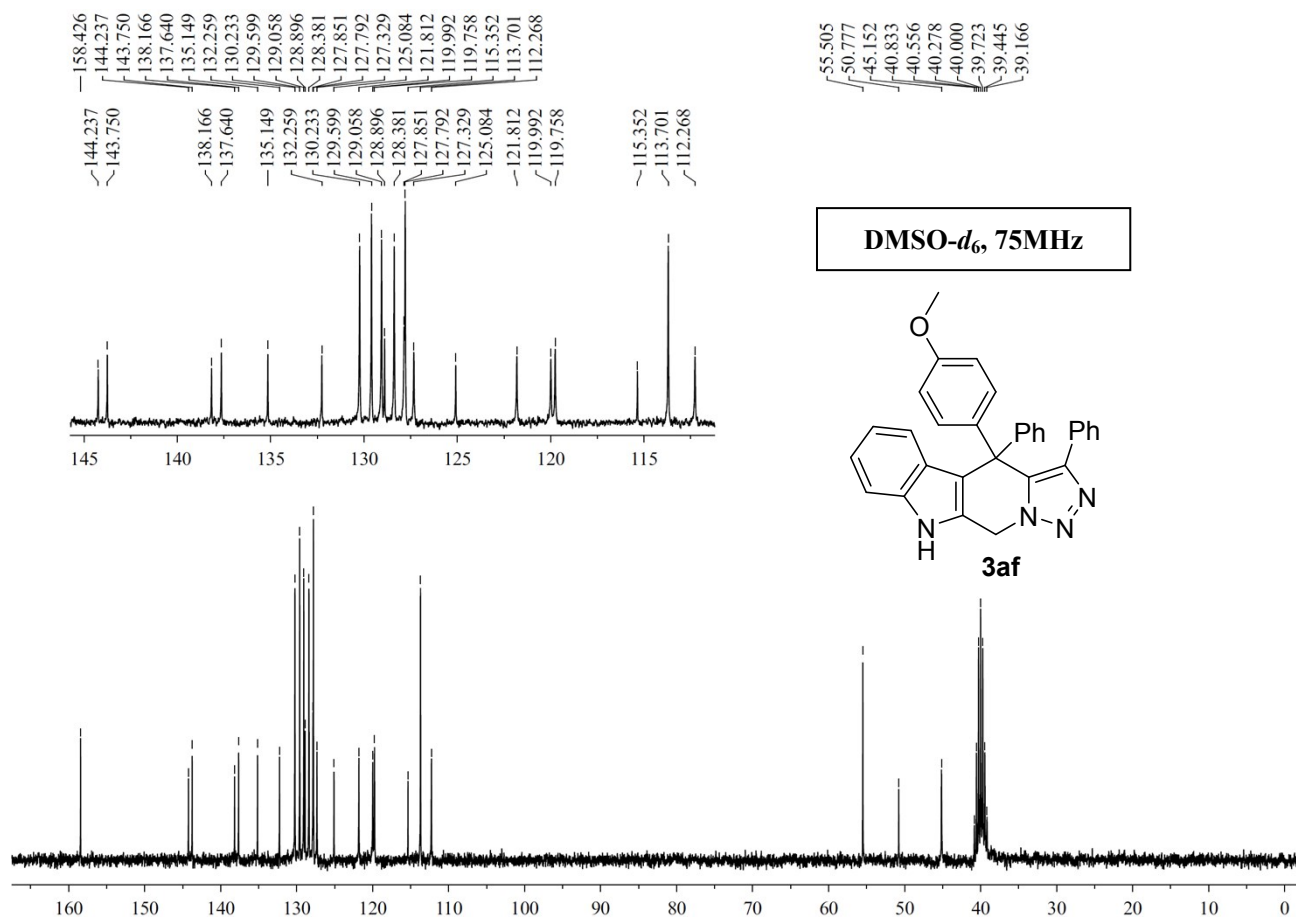

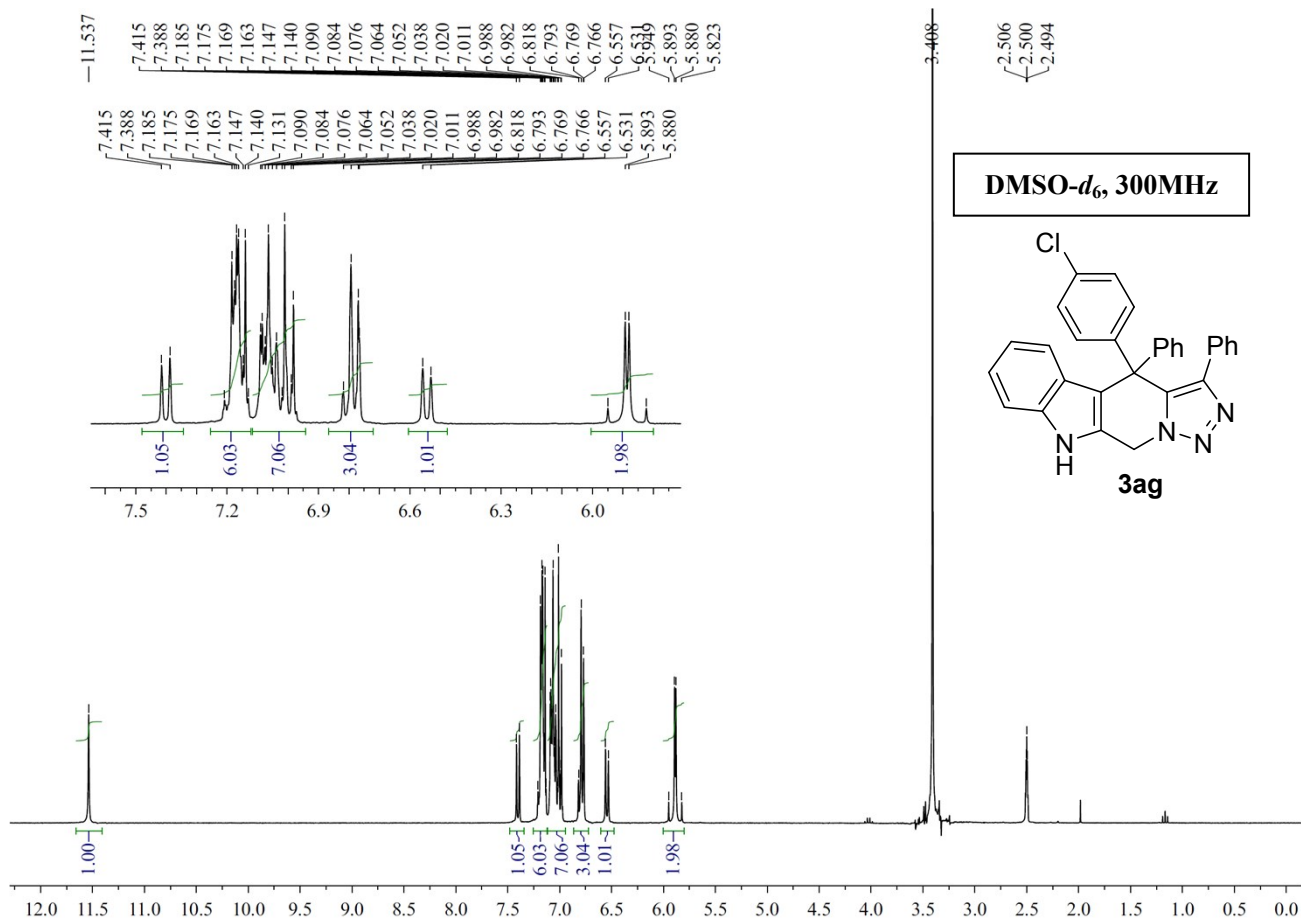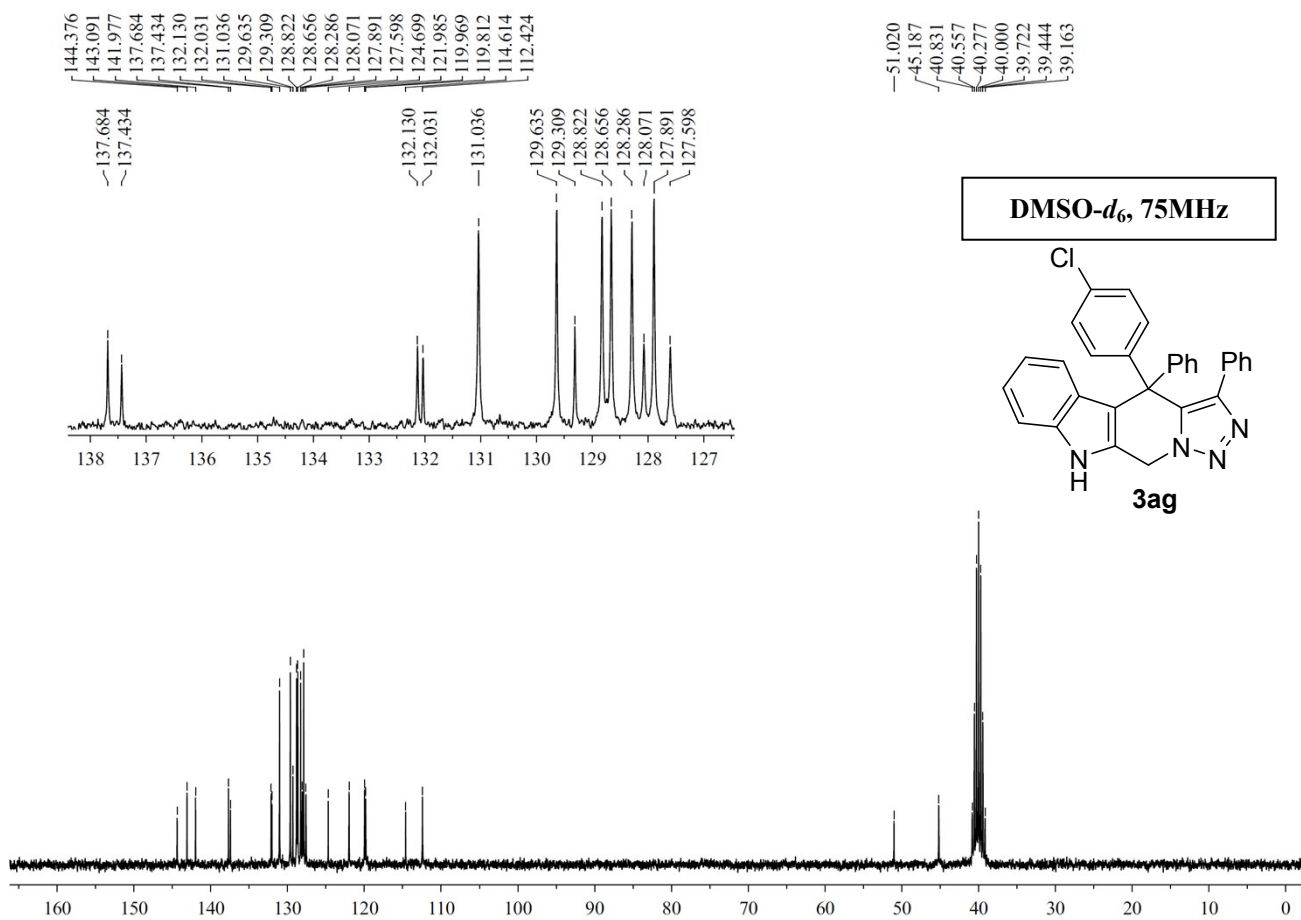



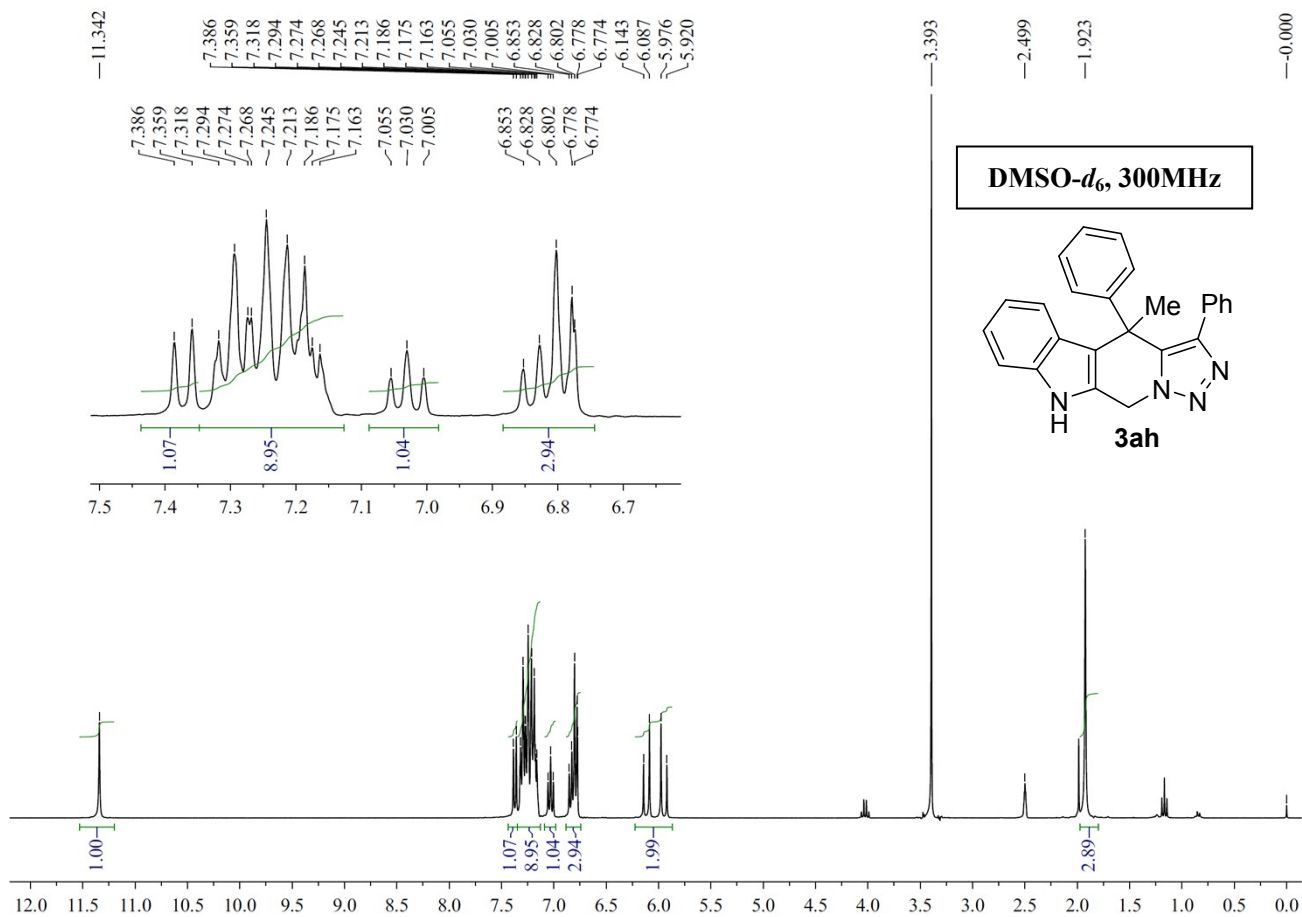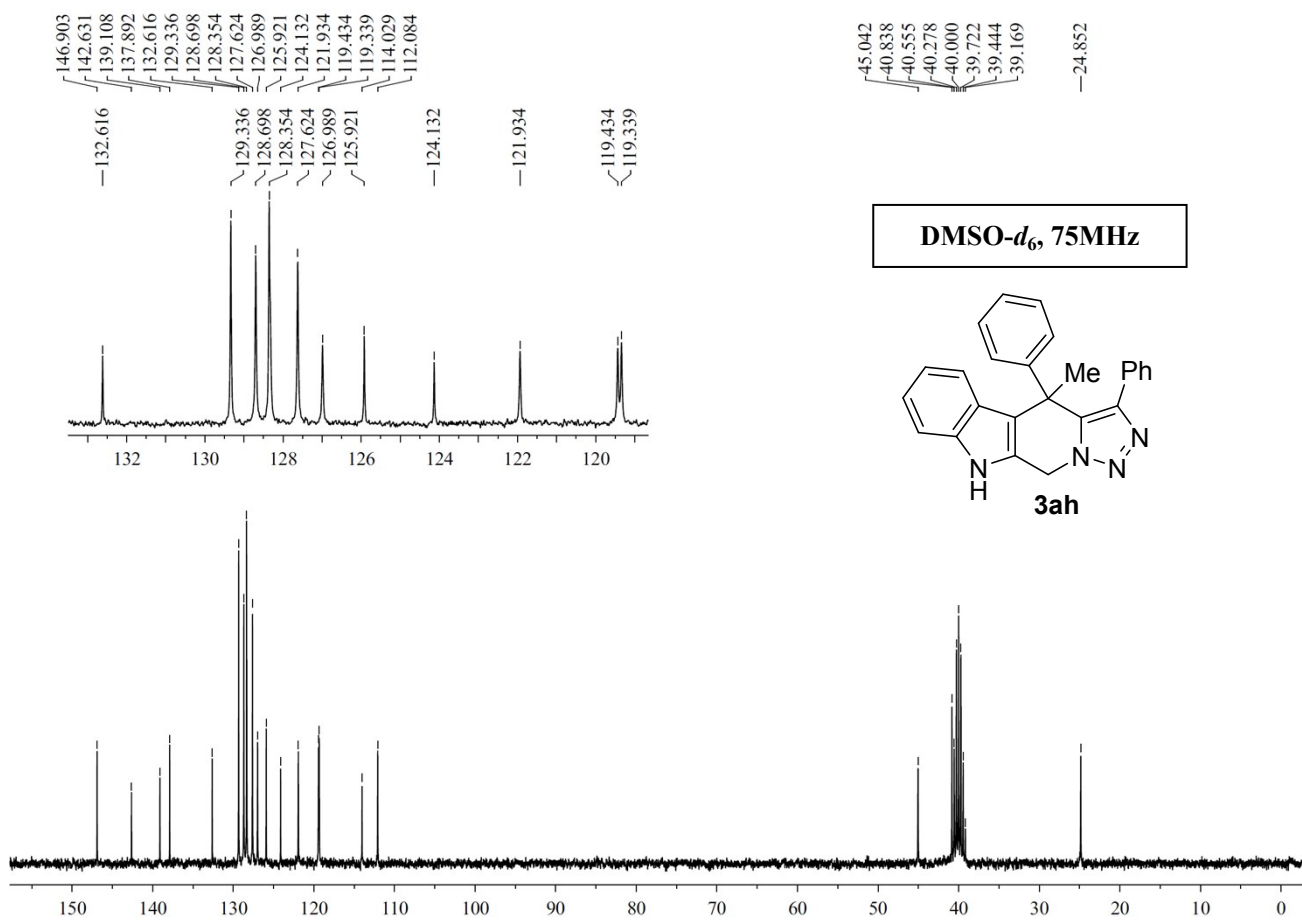

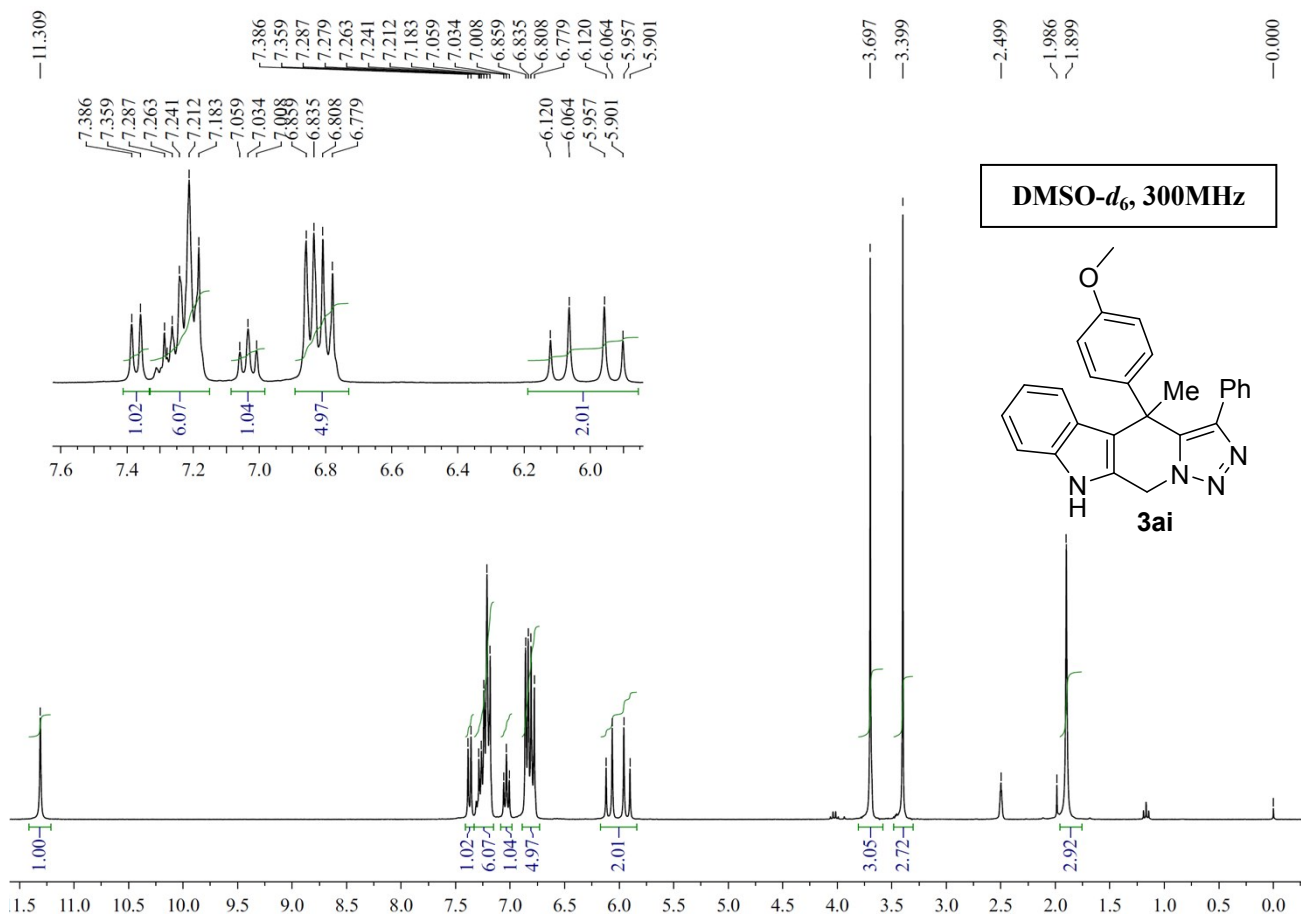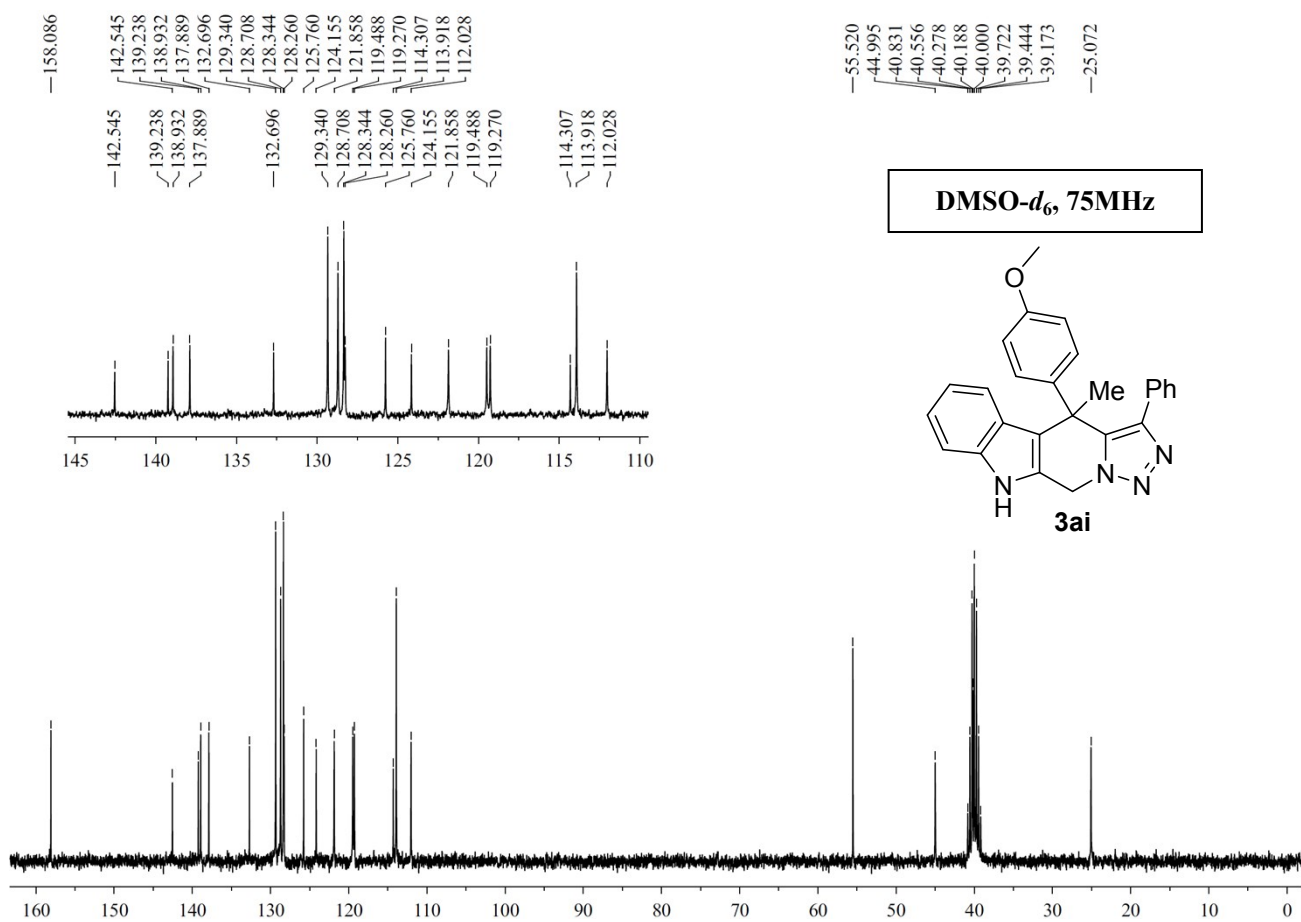

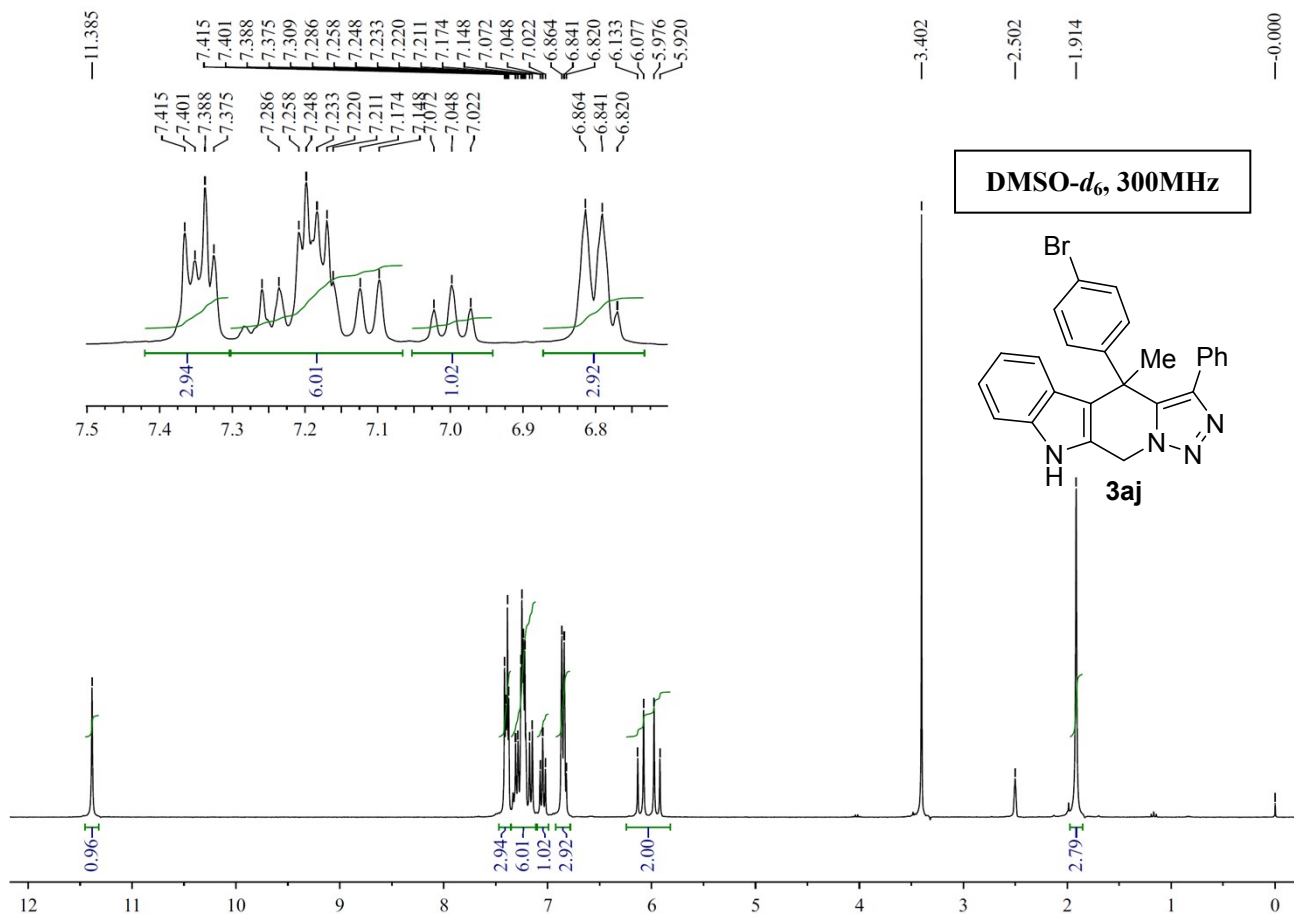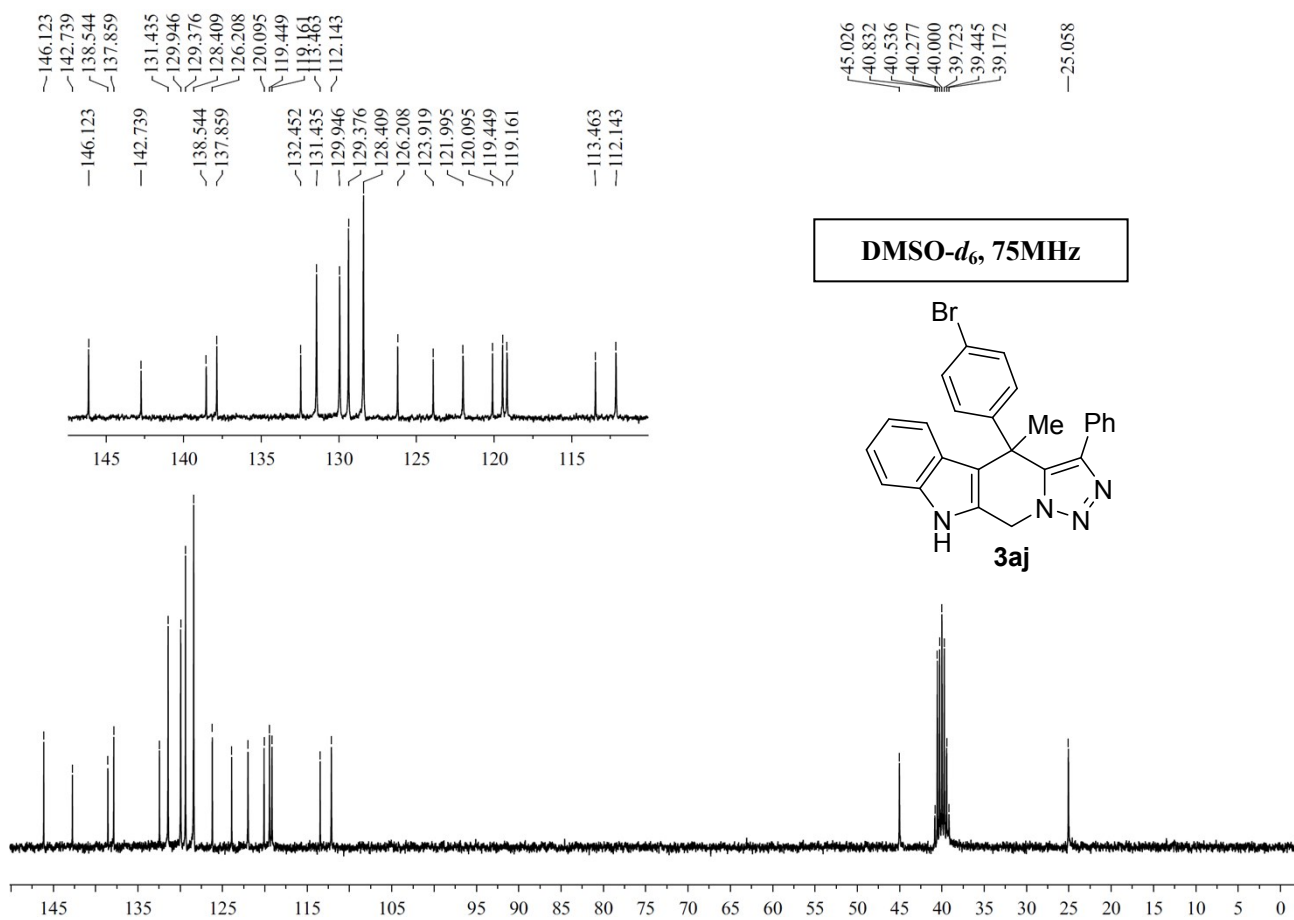

DMSO-*d*<sub>6</sub>, 300MHz

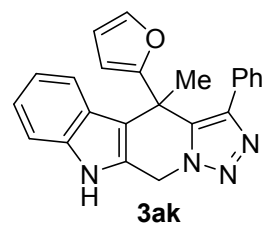

DMSO-*d*<sub>6</sub>, 75MHz

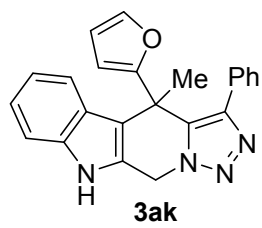

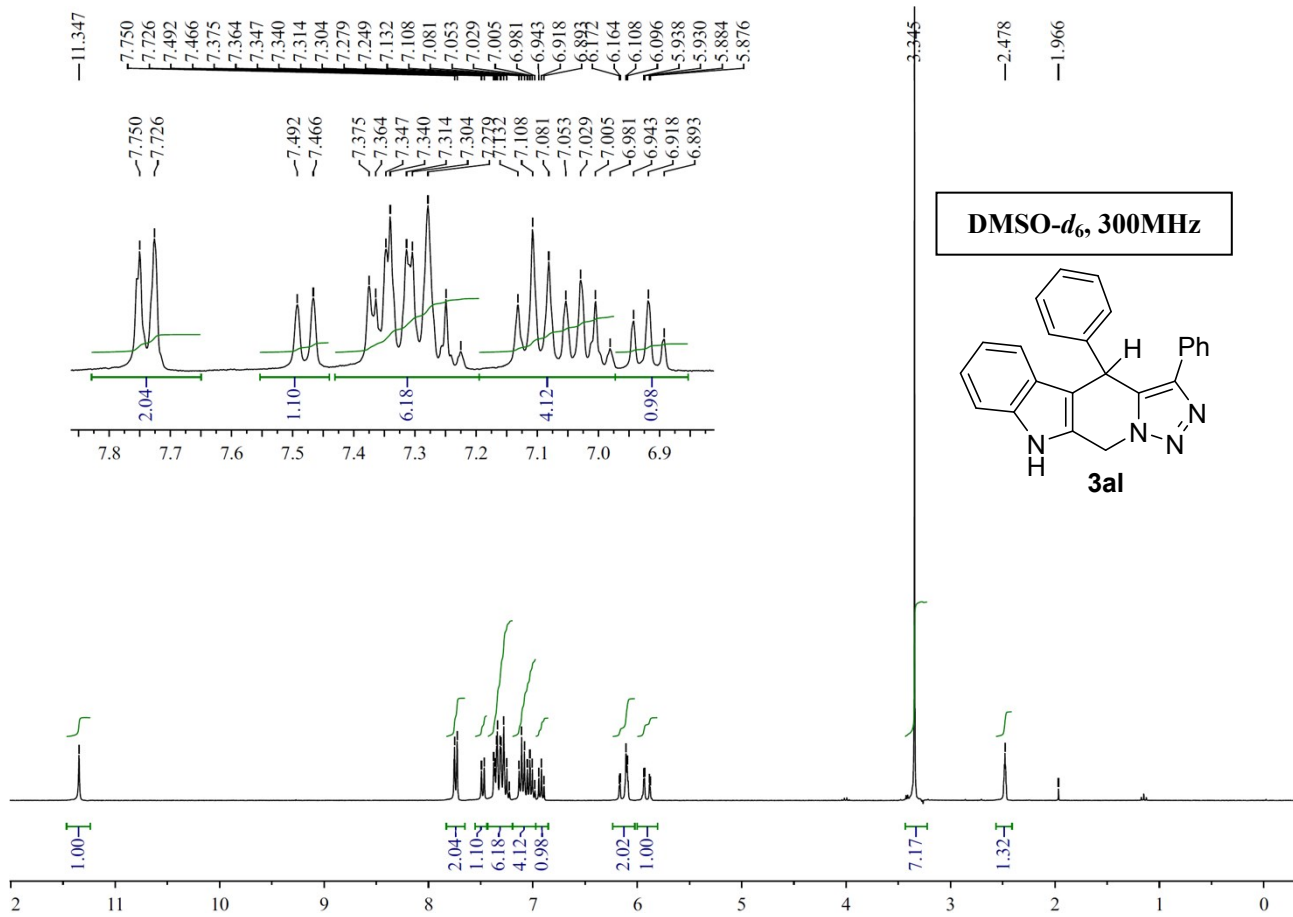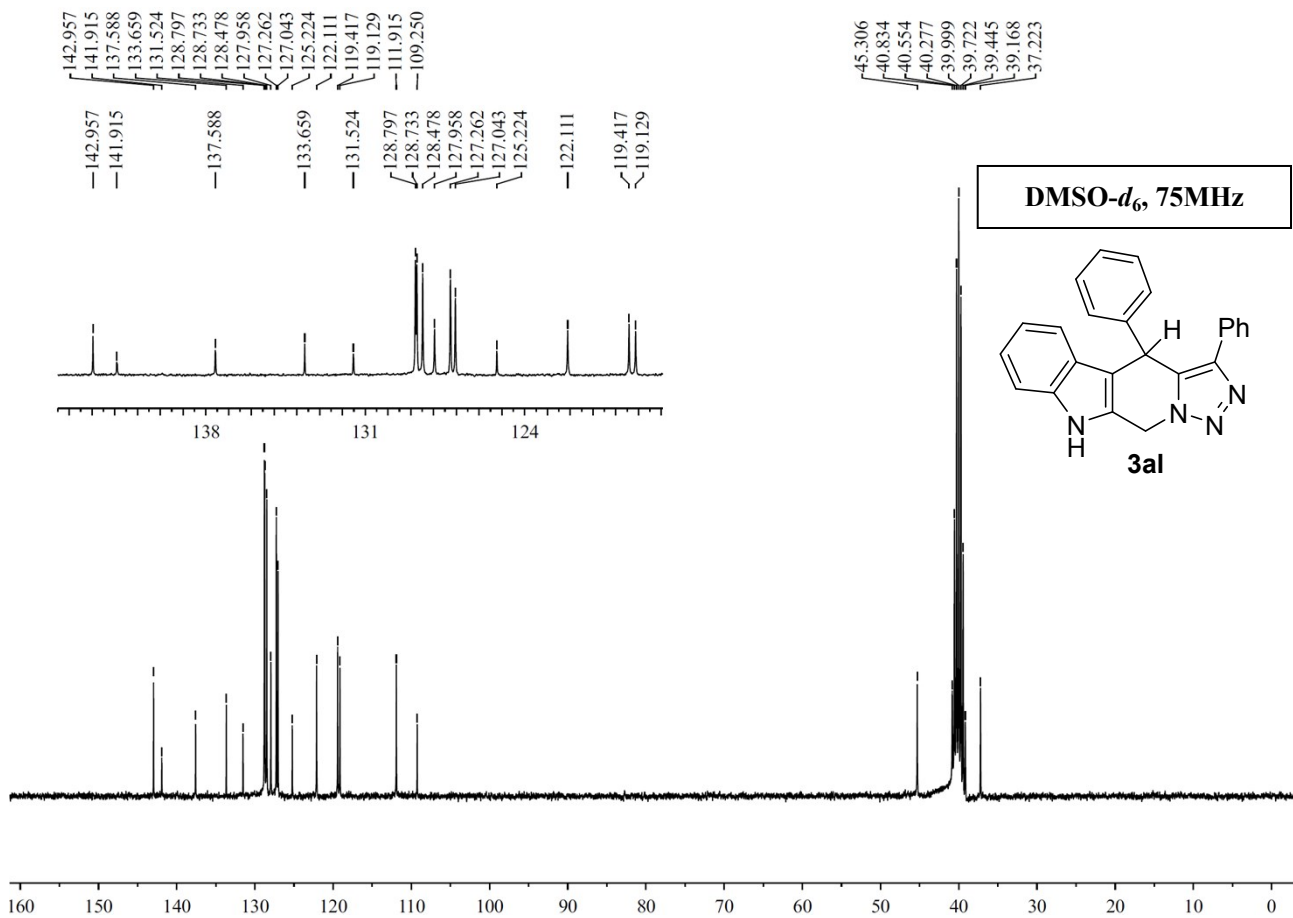

DMSO-*d*<sub>6</sub>, 300MHz

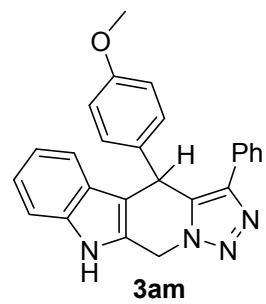

DMSO-*d*<sub>6</sub>, 75MHz

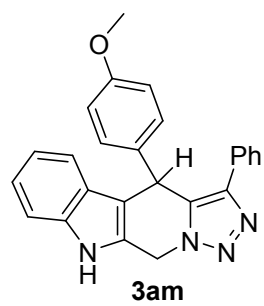

DMSO-*d*<sub>6</sub>, 300MHz

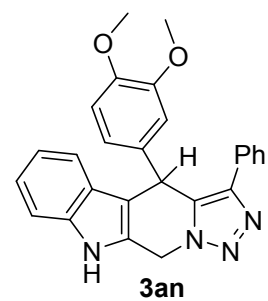

DMSO-*d*<sub>6</sub>, 75MHz

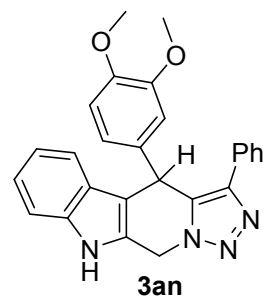

DMSO-*d*<sub>6</sub>, 300MHz

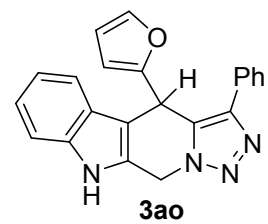

DMSO-*d*<sub>6</sub>, 75MHz

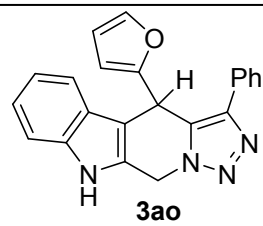



DMSO-*d*<sub>6</sub>, 300MHz

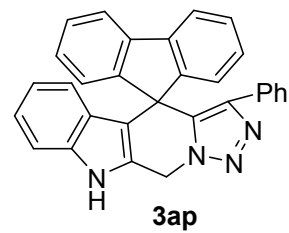

DMSO-*d*<sub>6</sub>, 75MHz

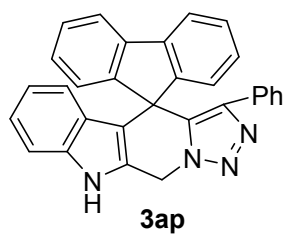

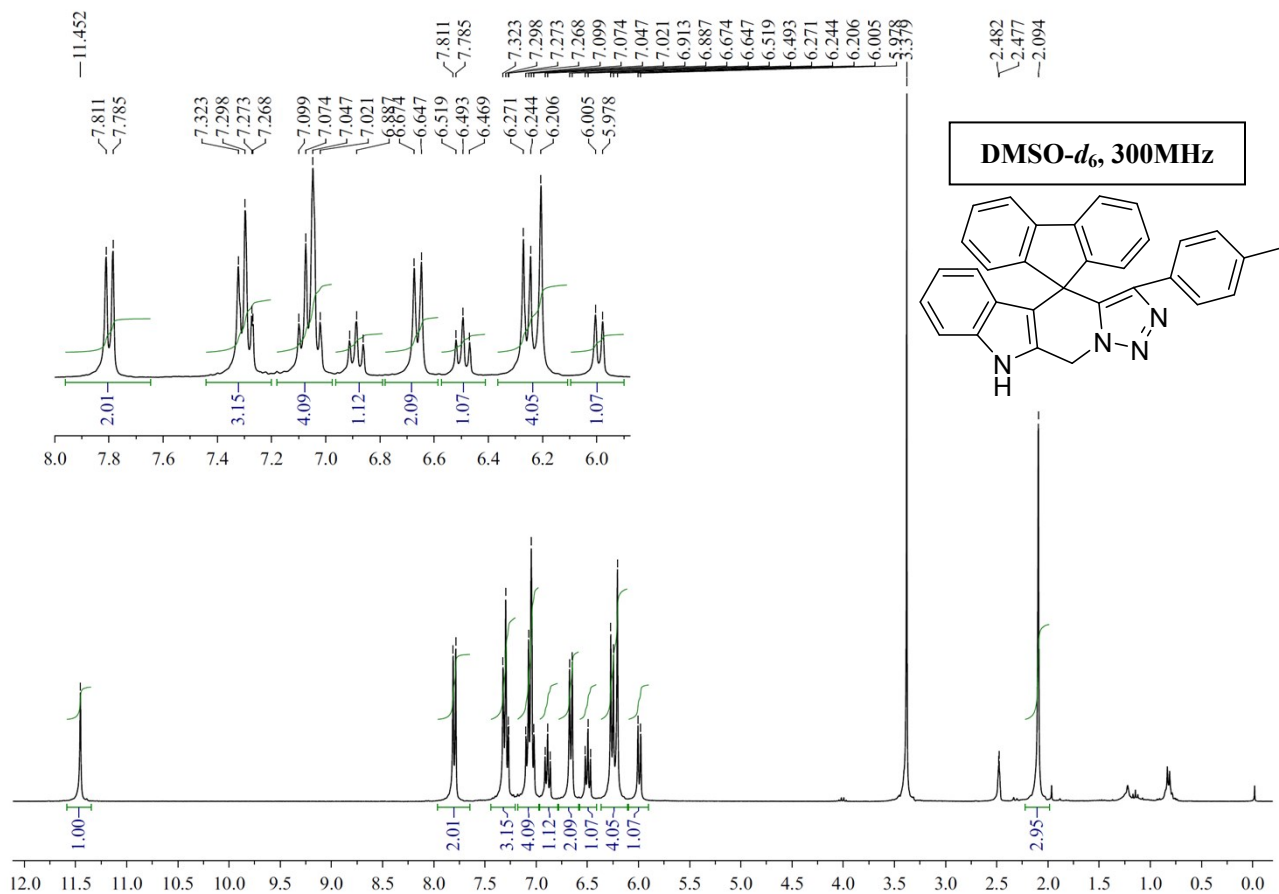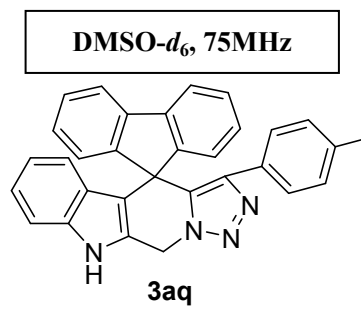

DMSO-*d*<sub>6</sub>, 300MHz

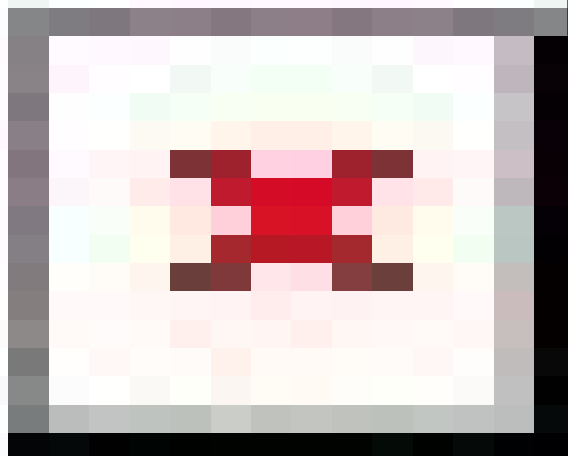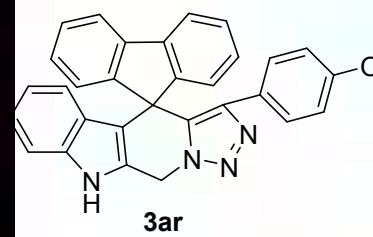

DMSO-*d*<sub>6</sub>, 75MHz

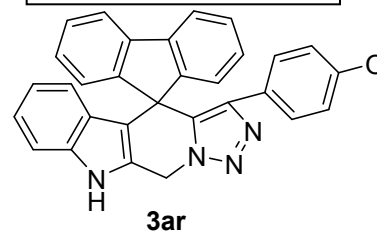

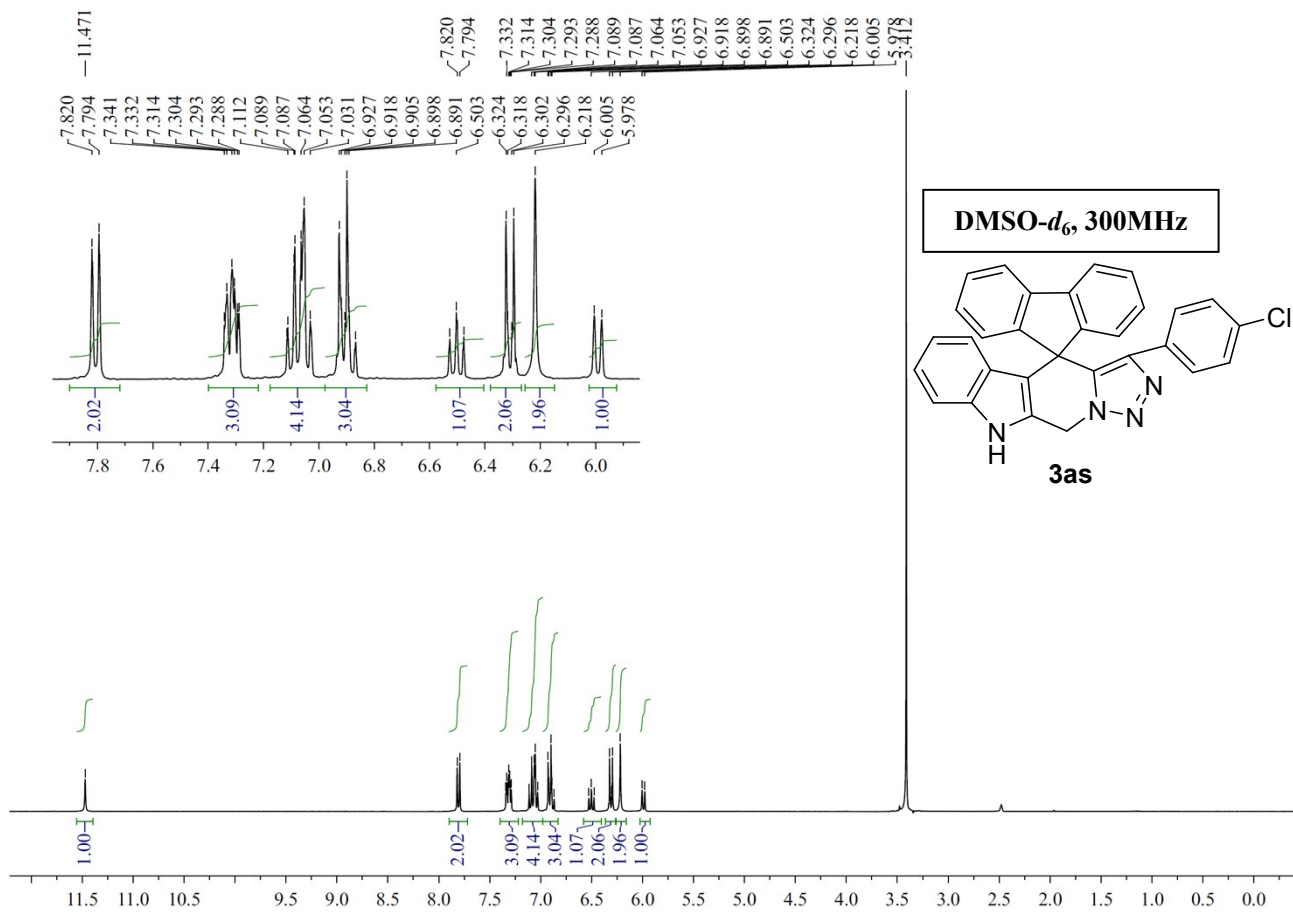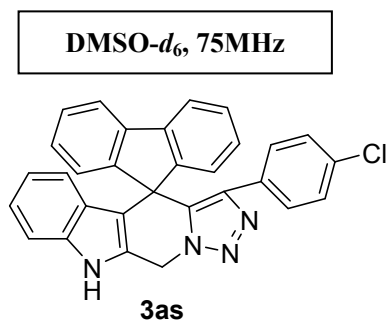

**DMSO-*d*<sub>6</sub>, 300MHz**

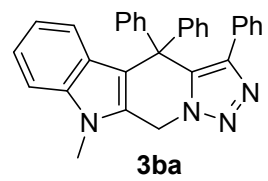

**DMSO-*d*<sub>6</sub>, 75MHz**

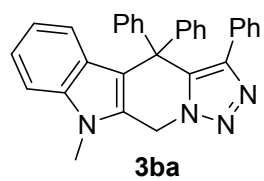

DMSO-*d*<sub>6</sub>, 300MHz

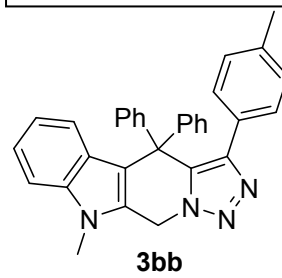

DMSO-*d*<sub>6</sub>, 75MHz

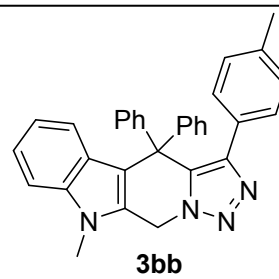

DMSO-*d*<sub>6</sub>, 300MHz

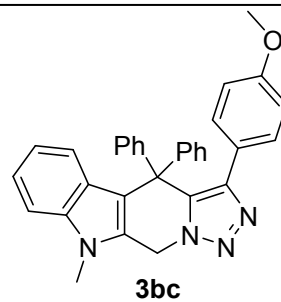

DMSO-*d*<sub>6</sub>, 75MHz

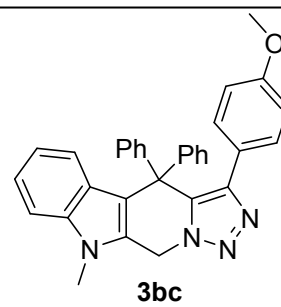

DMSO-*d*<sub>6</sub>, 300MHz

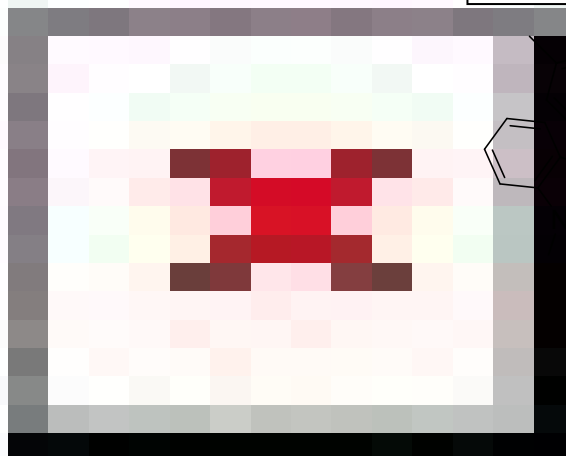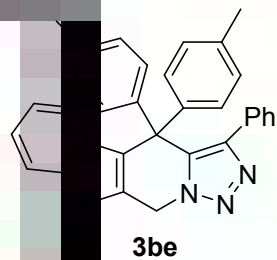

144.182  
140.482  
138.378  
138.049  
136.444  
132.217  
130.344  
129.603  
128.904  
127.770  
127.707  
124.565  
121.724  
120.197  
119.864  
114.747  
110.402

144.182  
140.482  
138.378  
138.049  
136.444  
132.217  
130.344  
129.603  
128.904  
127.770  
127.707  
124.565  
121.724  
120.197  
119.864

144 142 140 138 136 134 132 130 128 126 124 122 120

50.786  
44.384  
40.555  
40.278  
40.000  
39.723  
30.443  
20.943

DMSO-*d*<sub>6</sub>, 75MHz

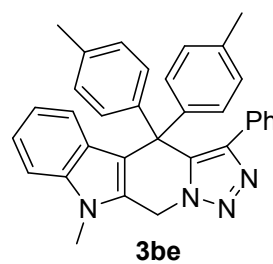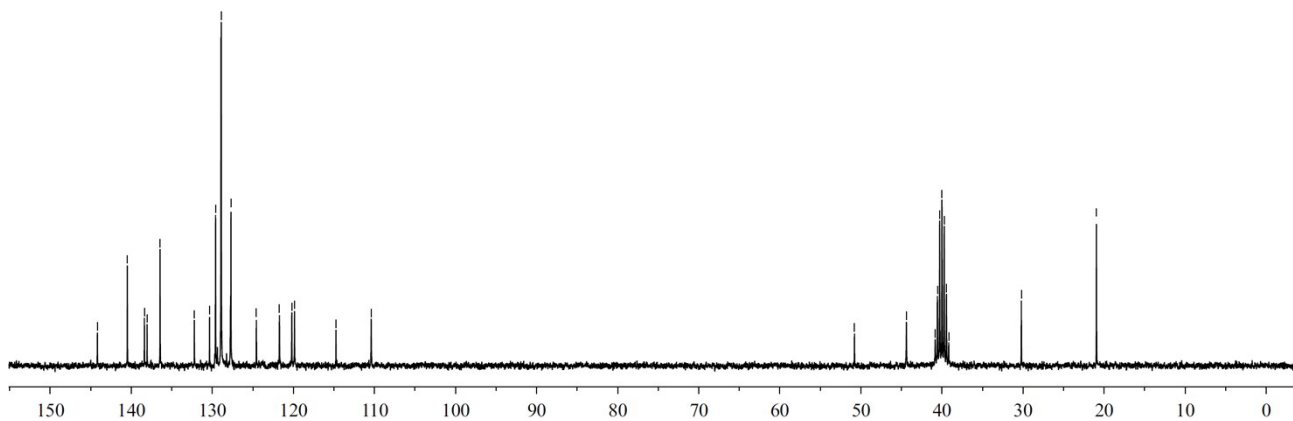



DMSO-*d*<sub>6</sub>, 300MHz

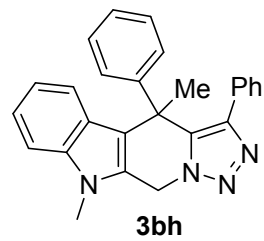

DMSO-*d*<sub>6</sub>, 75MHz

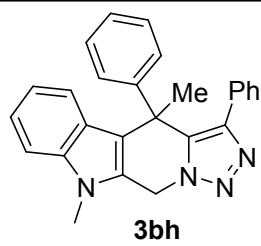

DMSO-*d*<sub>6</sub>, 300MHz

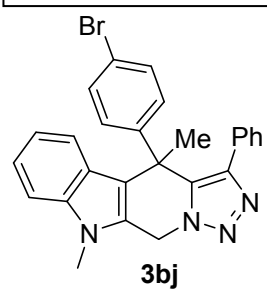

DMSO-*d*<sub>6</sub>, 75MHz

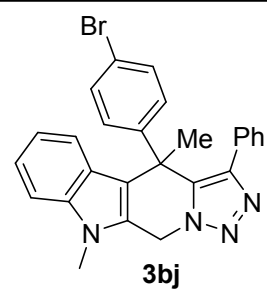

**DMSO-*d*<sub>6</sub>, 300MHz**

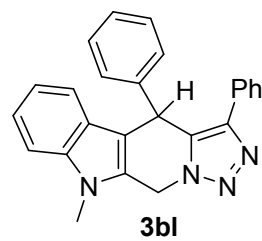

**DMSO-*d*<sub>6</sub>, 75MHz**

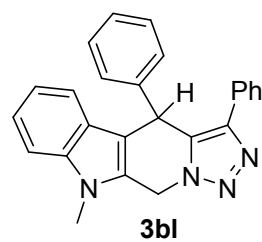

DMSO-*d*<sub>6</sub>, 300MHz

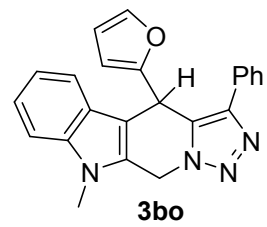

DMSO-*d*<sub>6</sub>, 75MHz

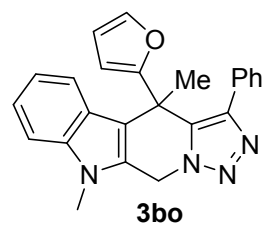

CDCl<sub>3</sub>, 300MHz

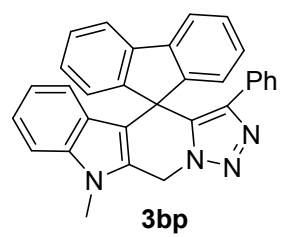

CDCl<sub>3</sub>, 75MHz

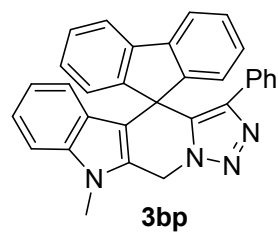

DMSO-*d*<sub>6</sub>, 300MHz

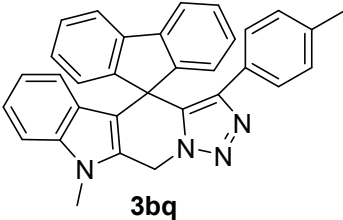

DMSO-*d*<sub>6</sub>, 75MHz

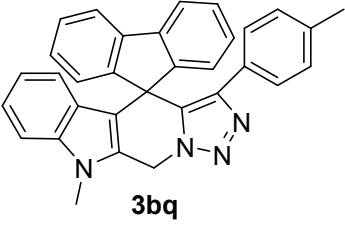

DMSO-*d*<sub>6</sub>, 400MHz

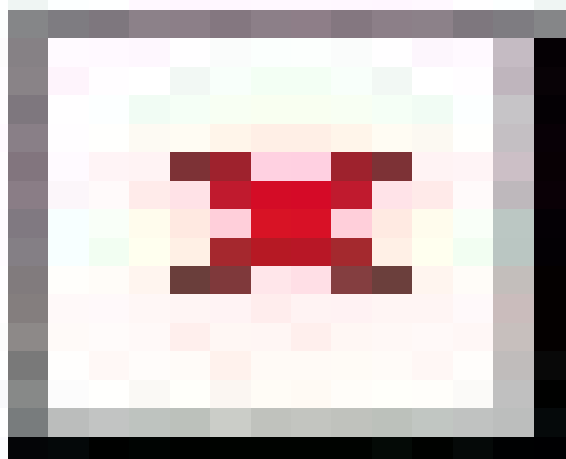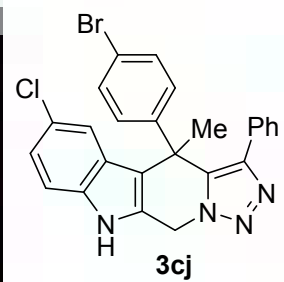

DMSO-*d*<sub>6</sub>, 100MHz

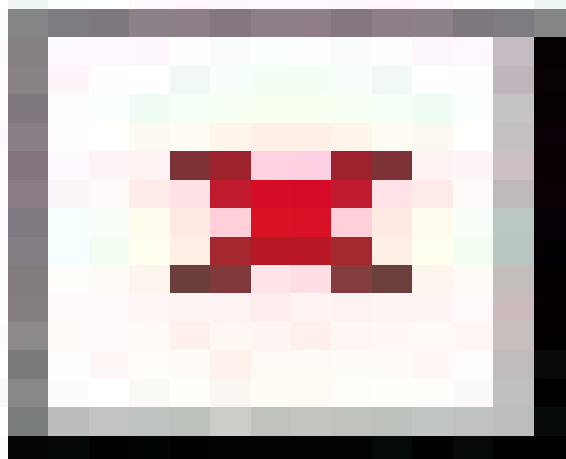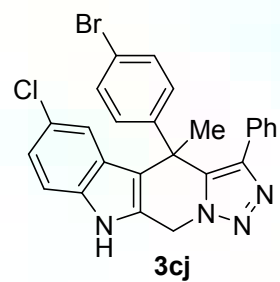

CDCl<sub>3</sub>, 300MHz

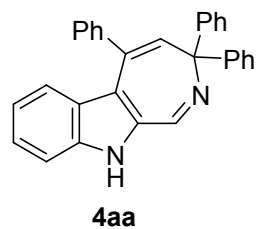

CDCl<sub>3</sub>, 75MHz

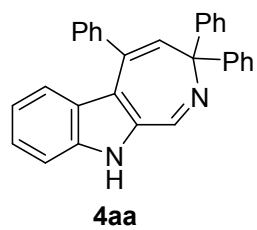



CDCl<sub>3</sub>, 300MHz

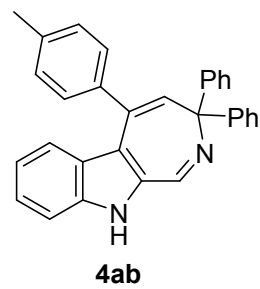

CDCl<sub>3</sub>, 75MHz

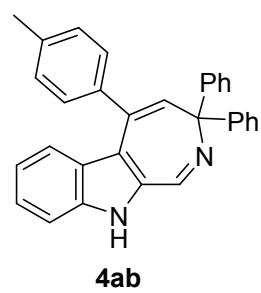

CDCl<sub>3</sub>, 300MHz

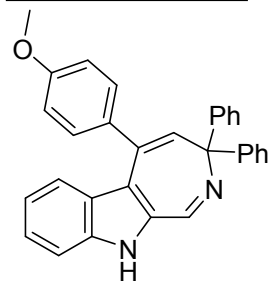

4ac

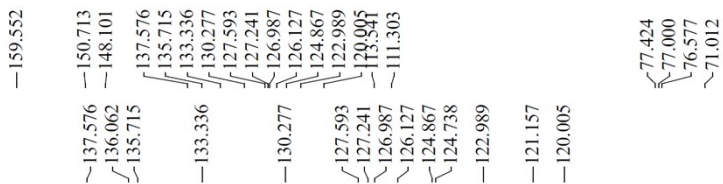

CDCl<sub>3</sub>, 75MHz

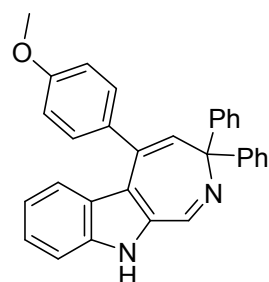

4ac

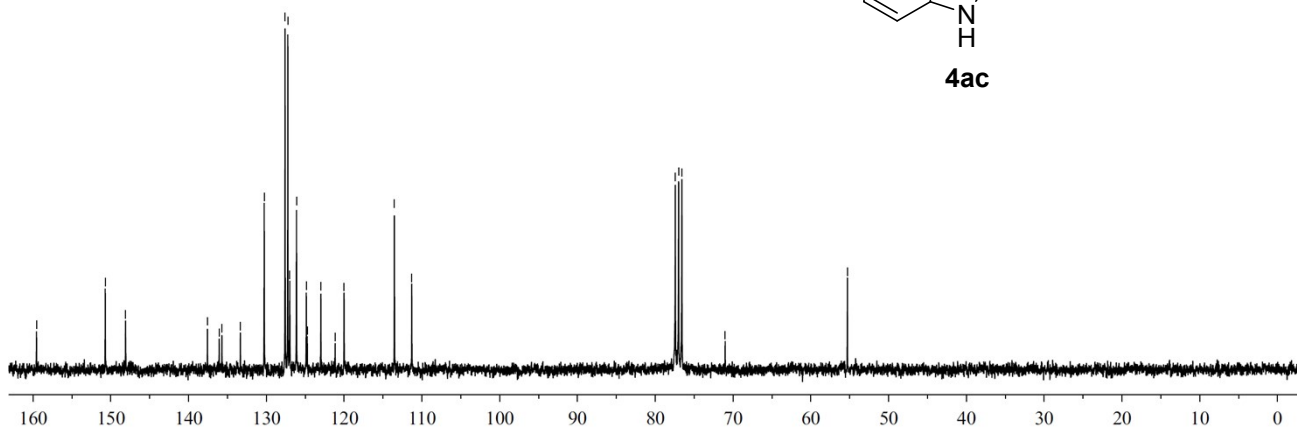

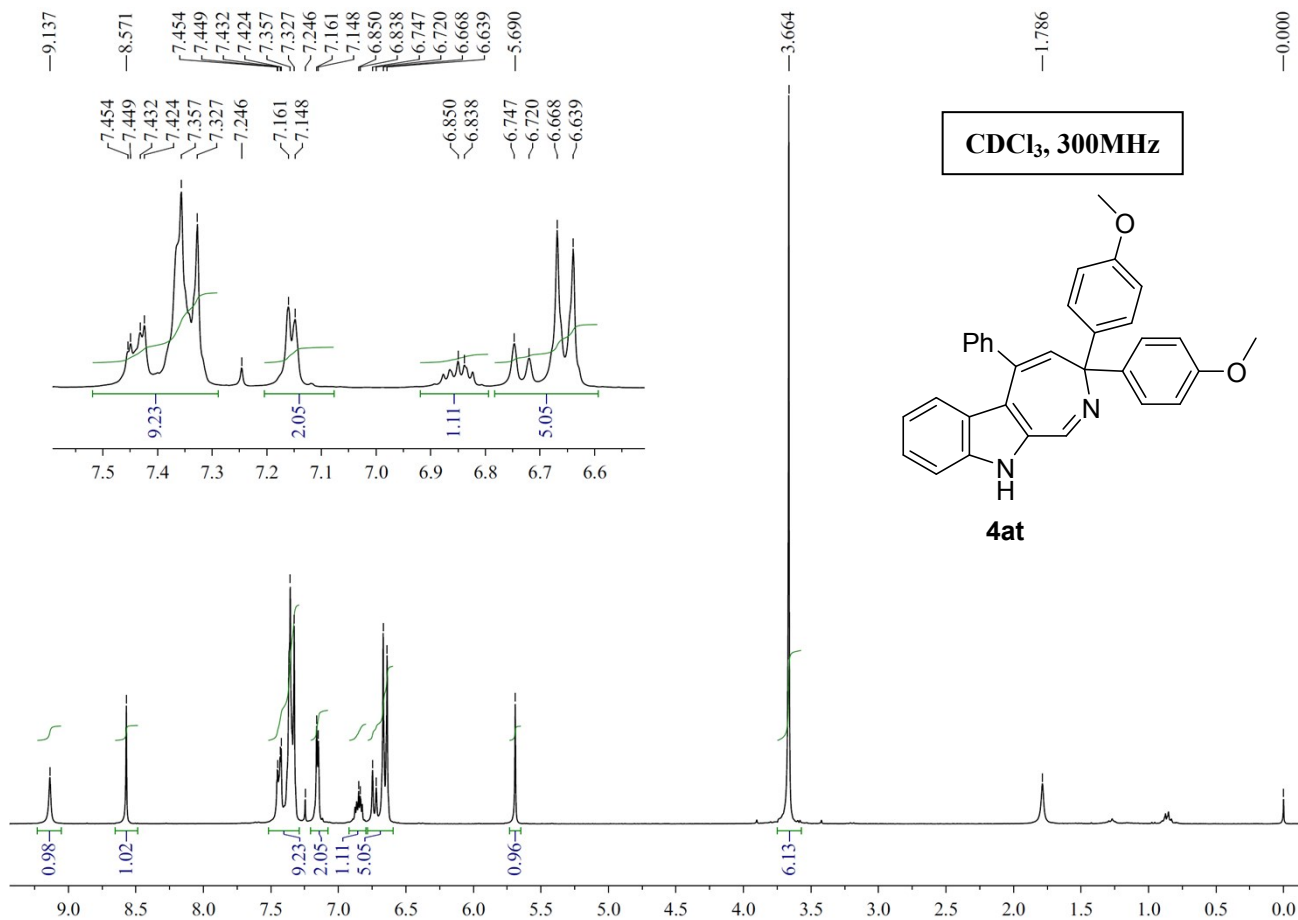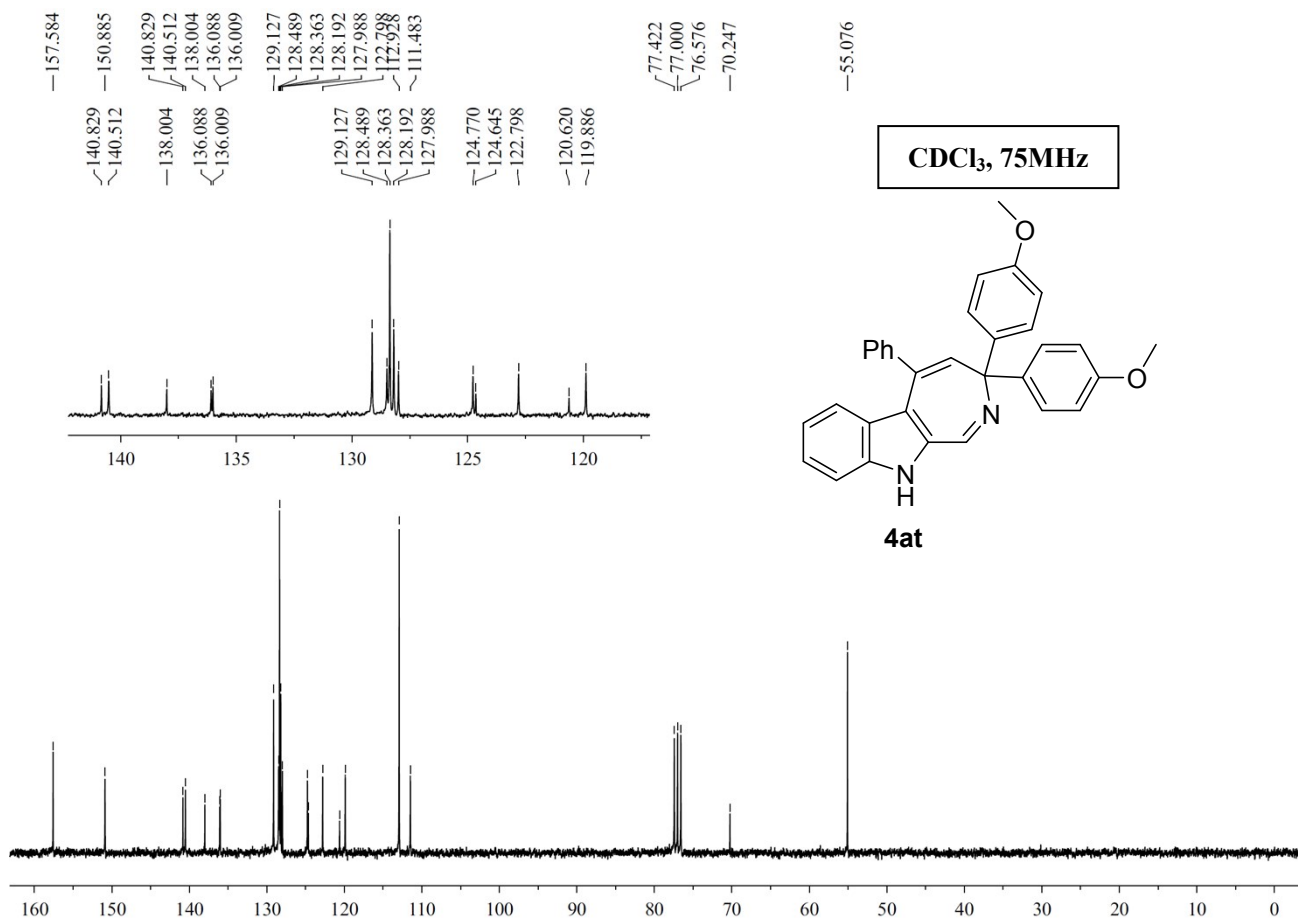

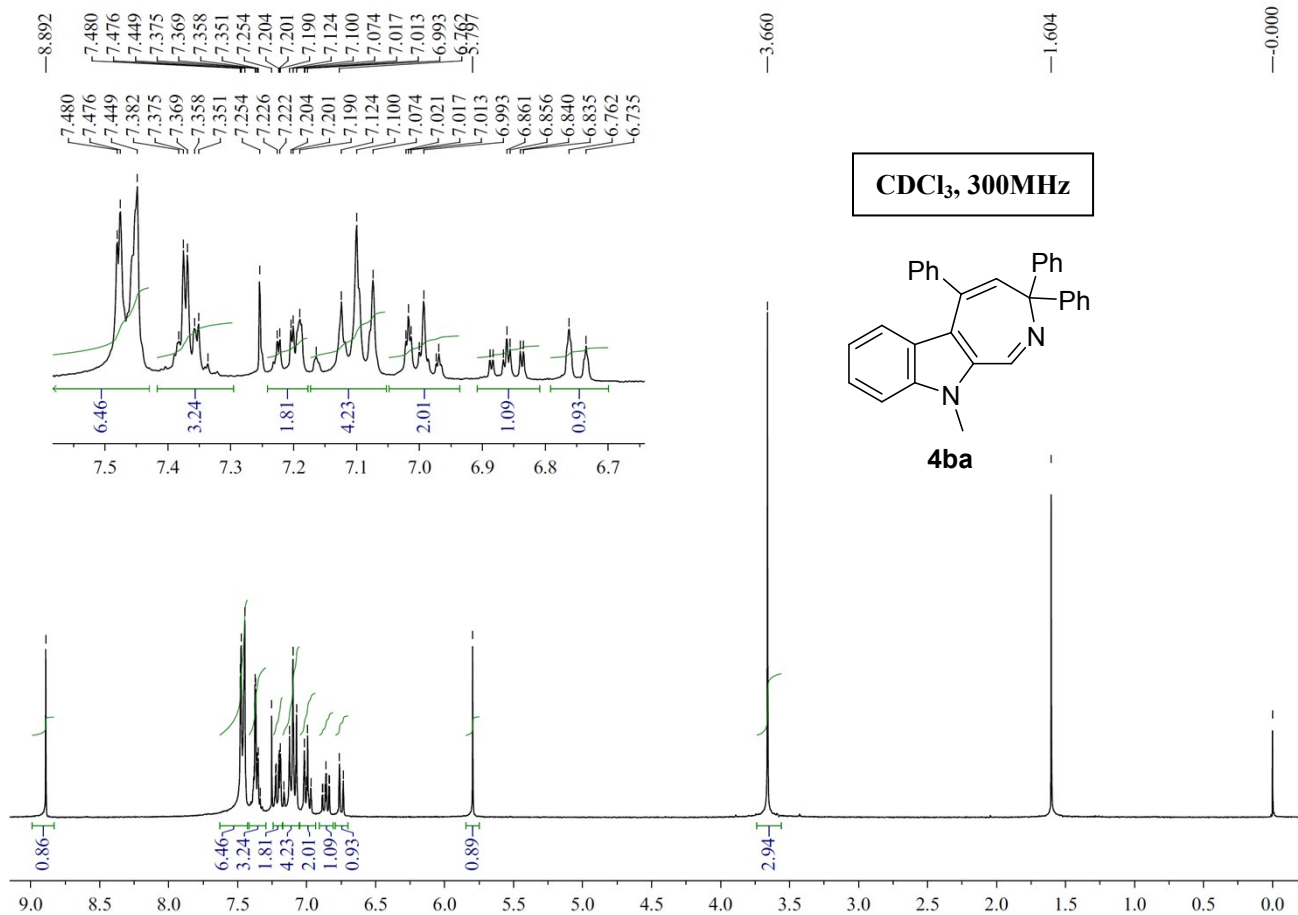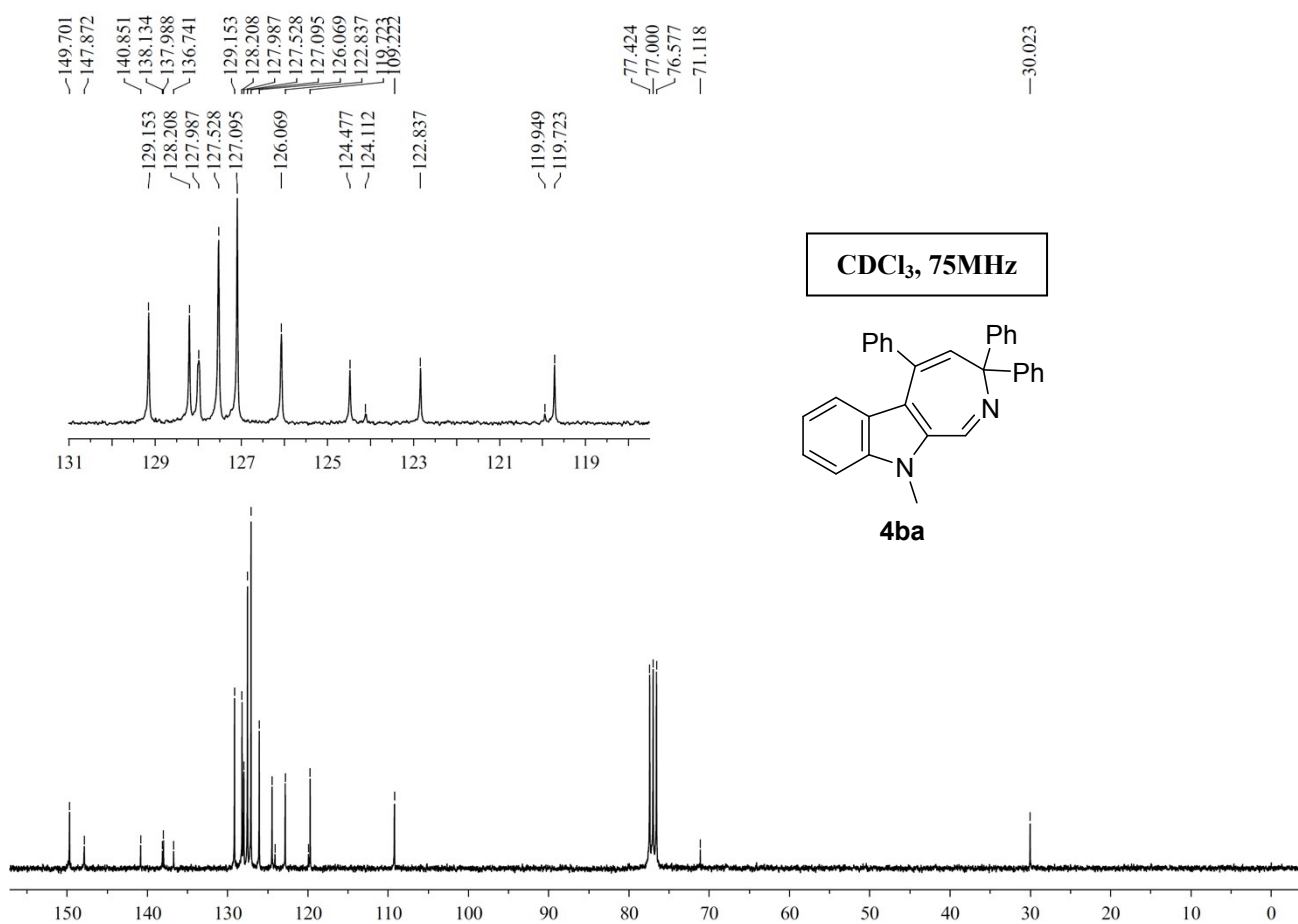

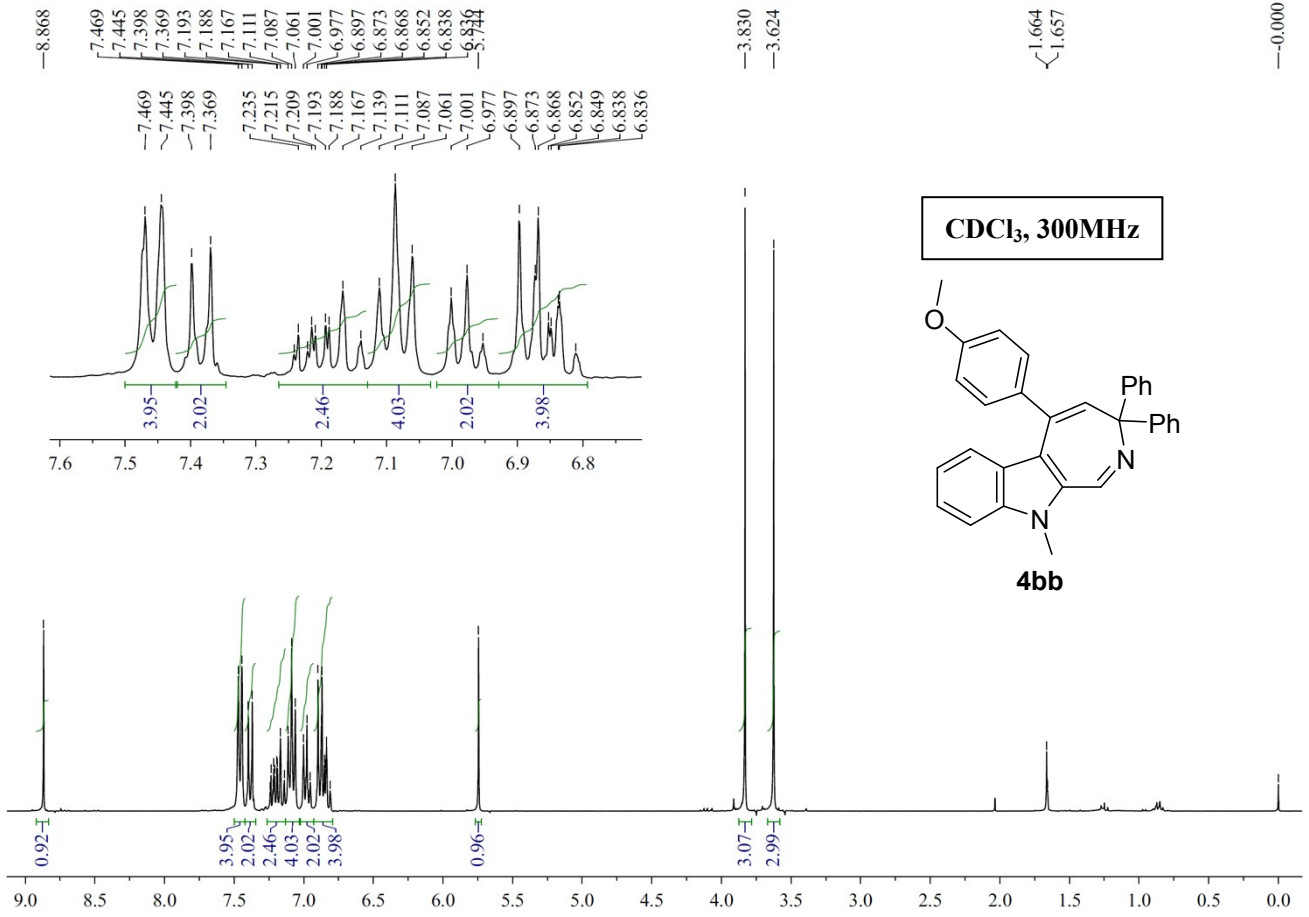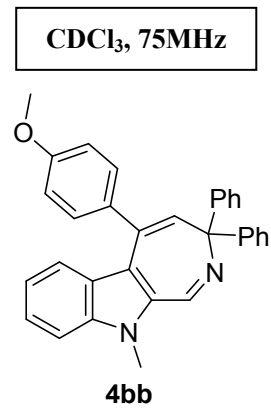

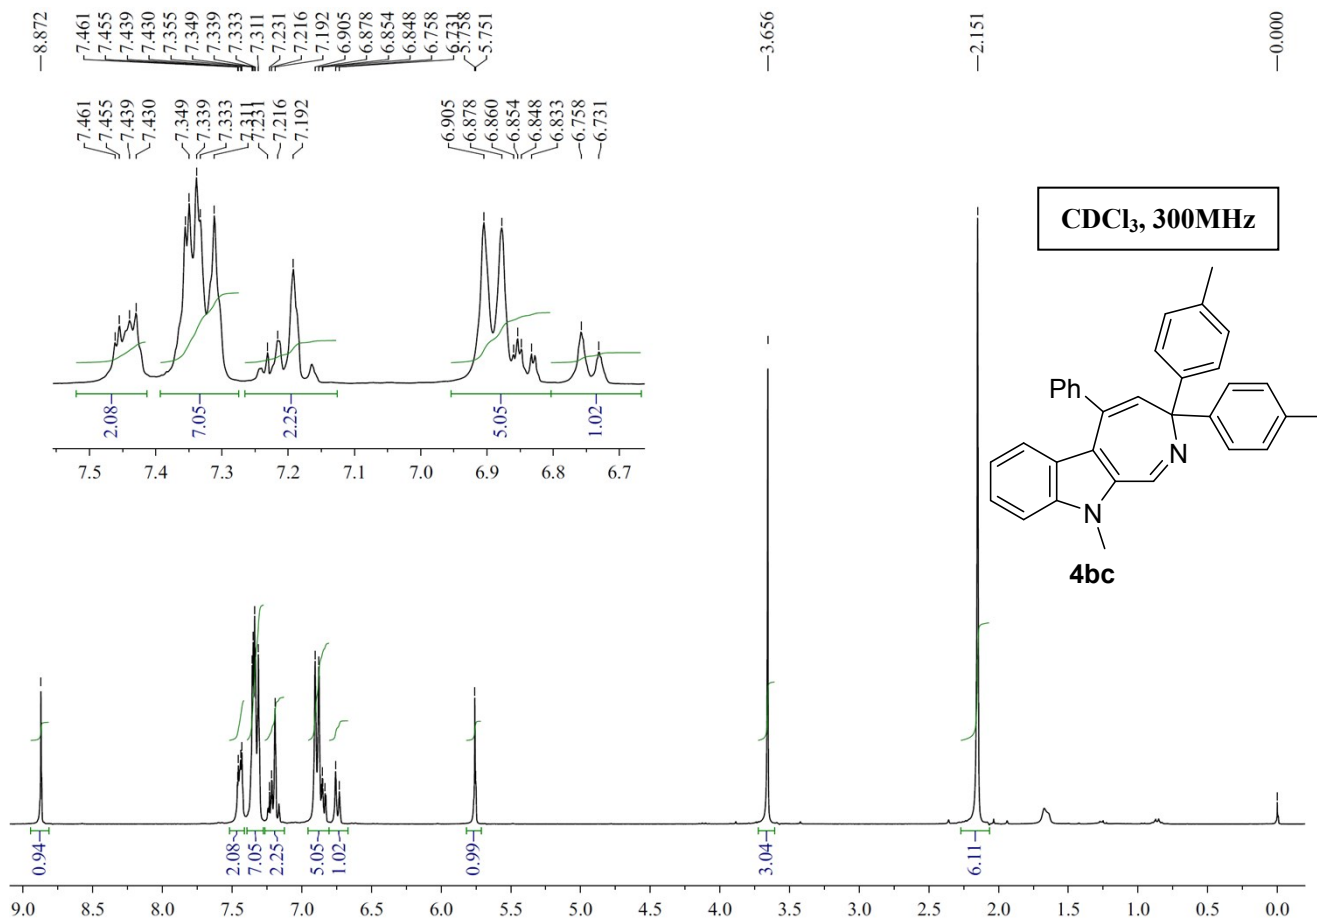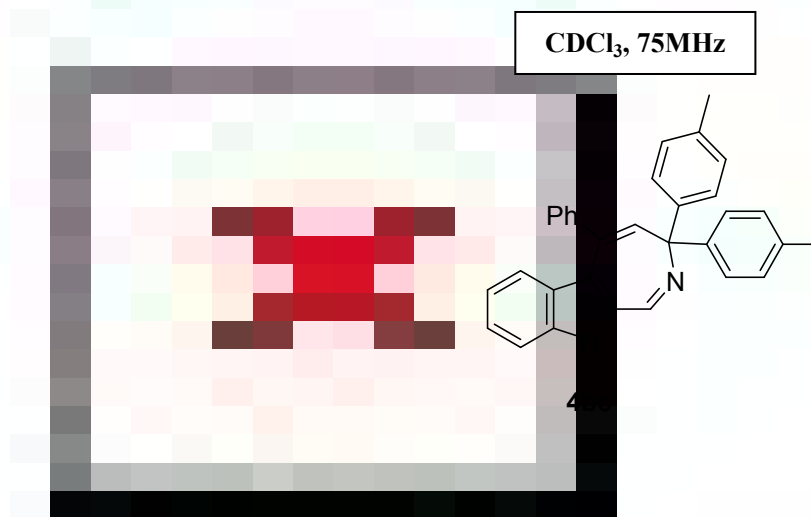

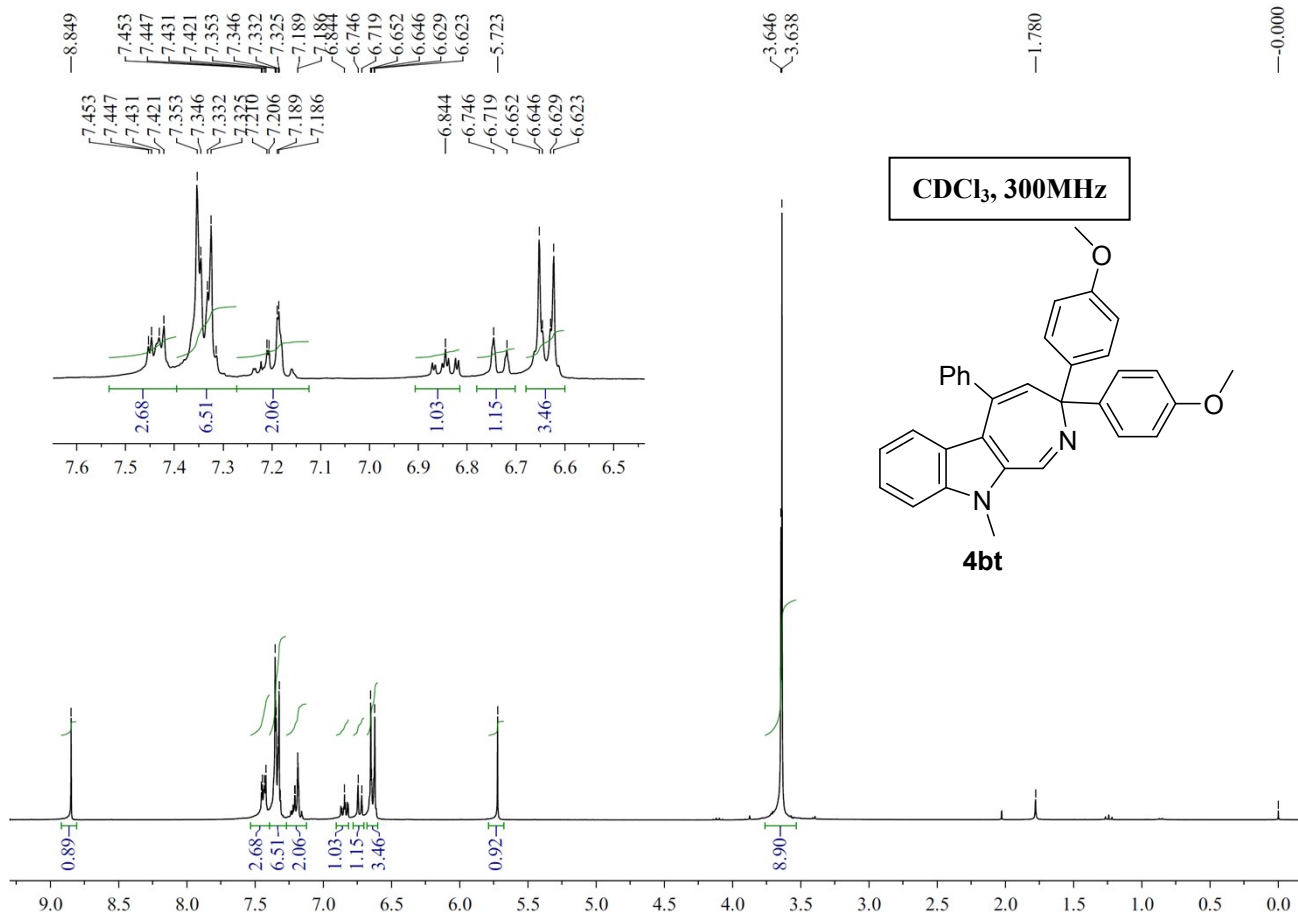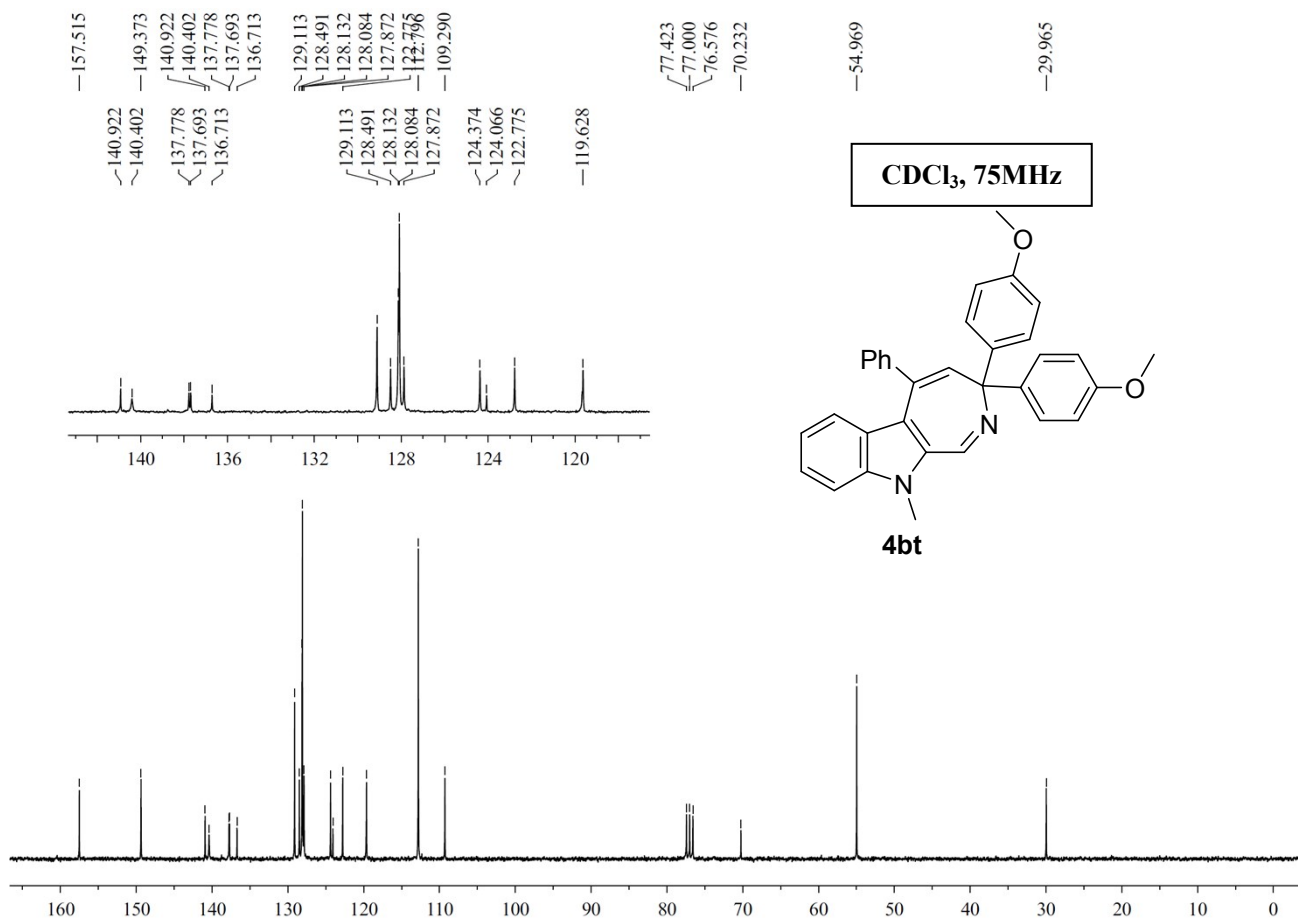

Supplement: d1ra03022a1.pdf [file d1ra03022a1.pdf]
